# Supplementary material for: Calcium tungstate: a convenient recoverable catalyst for hydrogen peroxide oxidation
Source: Royal Society of Chemistry journal article supplement (doi:10.1039/c6gc00725b), 2016-01-01

## Supporting information for:

### Calcium Tungstate: A Convenient Recoverable Catalyst for Hydrogen Peroxide Oxidation

Catlin M. Williamson, Peter Stonehouse and Keith S. Kyler\*

*Address: Department of Chemistry, Indiana University of Pennsylvania, Indiana, Pennsylvania, 15707*

*Keith.kyler@iup.edu*

#### Contents

|                                                                                                                                                                                         |       |        |
|-----------------------------------------------------------------------------------------------------------------------------------------------------------------------------------------|-------|--------|
| 1. General Procedure for the Oxidation of Amines                                                                                                                                        | ..... | S2     |
| 2. General Procedure for the Oxidation of Alkenes                                                                                                                                       | ..... | S2     |
| 3. General Procedure for the Oxidation of Alcohols                                                                                                                                      | ..... | S2     |
| 4. General Procedure for the Oxidation of Sulfides                                                                                                                                      | ..... | S2     |
| 5. UV-Visible spectral data for Na <sub>2</sub> WO <sub>4</sub> , Na <sub>2</sub> WO <sub>4</sub> /H <sub>2</sub> O <sub>2</sub> , and CaWO <sub>4</sub> /H <sub>2</sub> O <sub>2</sub> | ..... | S3-S4  |
| 6. Photographs and IR Spectra of CaWO <sub>4</sub> before and after Five cycles of Oxidation                                                                                            | ..... | S5-S6  |
| 7. <sup>1</sup> H & <sup>13</sup> C-NMR and Infrared spectra of Compounds                                                                                                               | ..... | S7-S36 |

1. **General Procedure for the Oxidation of Amines:** To 2.2 L of 30% H<sub>2</sub>O<sub>2</sub> (12.4 mol) was added 3.4 g (0.12 mol) of CaWO<sub>4</sub>. The mixture was warmed to 45 °C and the solid dissolved to produce a yellow solution. Then was added dropwise over a 30 min period, 1 kg (2.3 mol) of p-toluidine while maintaining the temperature below 50 °C. After complete addition, the mixture was warmed to 95 °C for about 1 h at which point the yellow color of the aqueous phase disappeared and the colorless CaWO<sub>4</sub> precipitated. The mixture was cooled to room temperature, and the organic phase was separated and distilled to afford, 1.1 kg (98%) of p-nitrotoluene, (**2**), mp 49-51 °C, whose <sup>1</sup>H-NMR and IR spectra were consistent with reported data. The aqueous phase was filtered and the CaWO<sub>4</sub> (3.4g, >99%+) was recovered.

2. **General Procedure for the Oxidation of Alkenes.** To 45.0 mL of 30% H<sub>2</sub>O<sub>2</sub> (0.4 mol) and 45 mL of t-butanol was added 0.288 g (1 mmol) of CaWO<sub>4</sub>. The mixture was warmed to 45 °C and the solid dissolved to produce a yellow solution. Then was added 9.4 g (0.10 mol) of norbornene and the mixture was stirred vigorously for 4h at 65 °C. The mixture was then warmed to 95 °C for approximately 10 min at which point the yellow color of the aqueous phase disappeared and the colorless CaWO<sub>4</sub> precipitated. The mixture was cooled to room temperature, and organic product was extracted with ethyl acetate. The organic phase was dried over anhydrous MgSO<sub>4</sub>, and evaporated to afford 10.55 g (98%) of *exo*-2,3-epoxynorbornane (**5**). <sup>1</sup>H-NMR (CDCl<sub>3</sub>) δ 0.92 (2H, d), 1.32 (4H, d), 2.20 (2H, br s) and 3.18 (2H, br s). Decoupled <sup>13</sup>C-NMIR (CDCl<sub>3</sub>) δ 24.4, 25.5, 34.2, 51.0. The aqueous phase was filtered and the CaWO<sub>4</sub> (0.287g, 99%+) was recovered.

3. **General Procedure for the Oxidation of Alcohols.** To 453 mL of 30% H<sub>2</sub>O<sub>2</sub> (4.0 mol) and 400 mL of methanol was added 2.88 g (0.01 mol) of CaWO<sub>4</sub>. The mixture was warmed to 45 °C and the solid dissolved to produce a yellow solution. Then was added 100 g (1.0 mol) of cyclohexanol and the mixture was stirred vigorously for 20 h at 65 - 70 °C. The mixture was then warmed to 95 °C for approximately 1 h at which point the yellow color of the aqueous phase disappeared and the colorless CaWO<sub>4</sub> precipitated. The mixture was cooled to room temperature, and organic layer was separated and distilled to afford 95 g (97%) of cyclohexanone, (**6**), bp 152-156 °C, lit., 156 °C.

4. **General Procedure for the Oxidation of sulfides.** To 22 mL of 30% H<sub>2</sub>O<sub>2</sub> (0.20 mol) and 20 mL of t-butanol was added 0.288 g (0.001 mol) of CaWO<sub>4</sub>. The mixture was warmed to 45 °C and the solid dissolved to produce a yellow solution. The mixture was then cooled to 25 °C, and was added 15.2 g (0.1 mol) of isopropylphenyl sulfide. The mixture was stirred vigorously for 0.5 h at 25 °C. The mixture was then warmed to 95 °C for approximately 1 h at which point the yellow color of the aqueous phase disappeared and the colorless CaWO<sub>4</sub> precipitated. The mixture was cooled to room temperature, and 50 mL of ethyl acetate was added then the organic layer was separated and dried over anhydrous MgSO<sub>4</sub>. Evaporation gave a crude colorless solid which was titrated with cold hexane, filtered, then dried to afford 17.7 g (96%) of a colorless solid, (**10**). IR (KBr) 3094, 2977, 1305, 1144, and 730 cm<sup>-1</sup>. GC-MS; 184 (M<sup>+</sup>), 142 (78), 78 (100), 51 (22), 43 (36).

5. **UV-Visible Spectra for Tungstate Solutions:** All spectra were recorded at 25 °C on a double-beam Perkin-Elmer Model 552A UV/Vis Spectrophotometer using either water or H<sub>2</sub>O<sub>2</sub>(aq) as blanks where appropriate. Data were recorded between 500 – 190 nm.

a) 1.0 mM Na<sub>2</sub>WO<sub>4</sub> in water

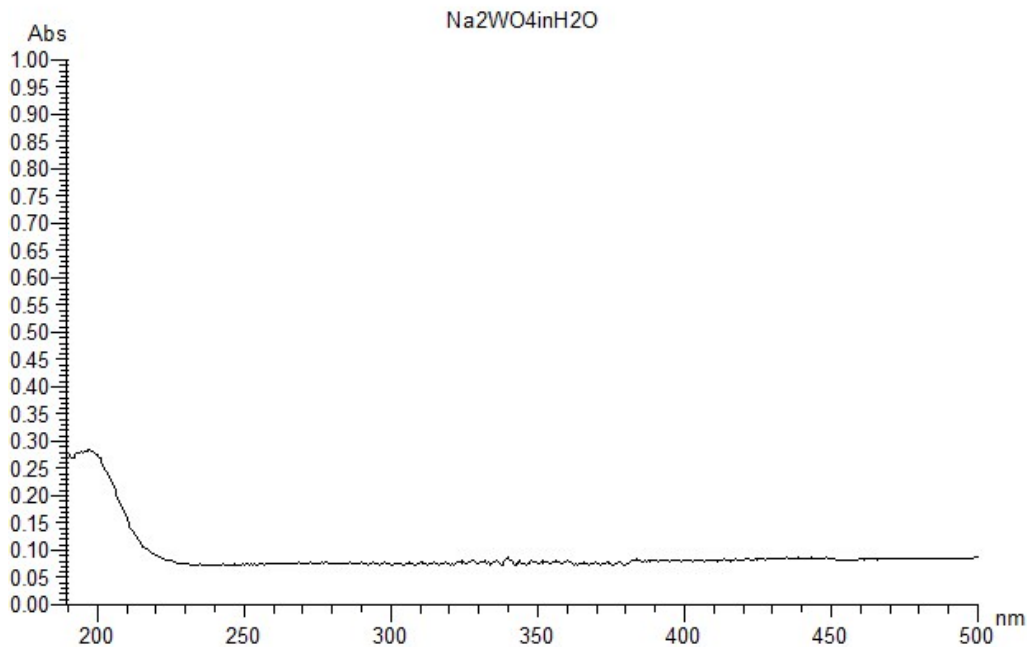

b) 1.0 mM Na<sub>2</sub>WO<sub>4</sub> in 8% H<sub>2</sub>O<sub>2</sub>

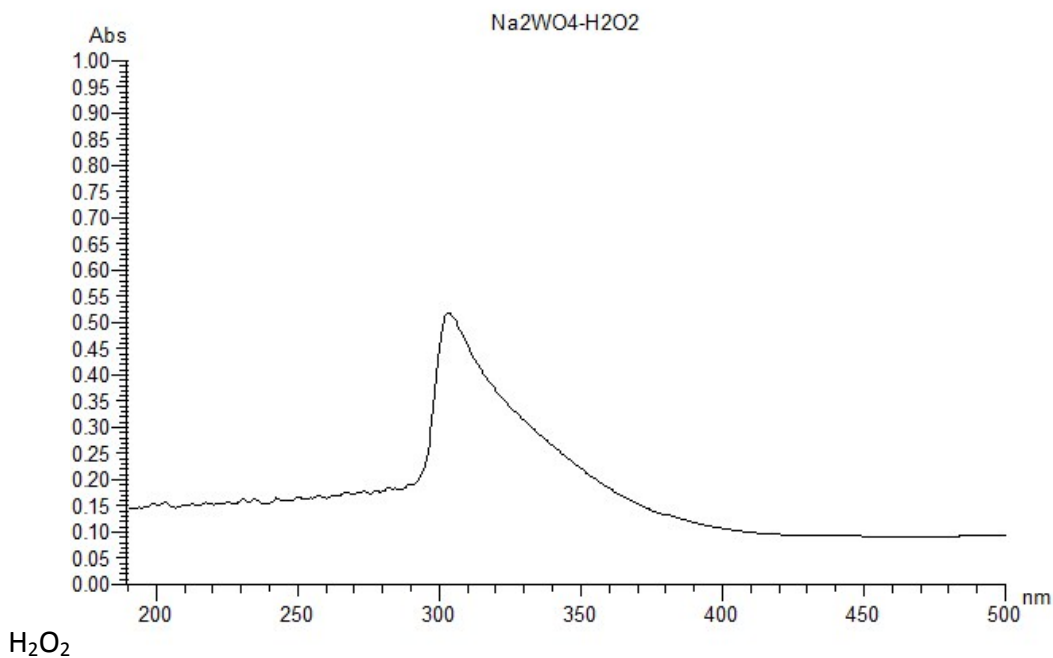

c) 1.0 mM CaWO<sub>4</sub> in 8% H<sub>2</sub>O<sub>2</sub>

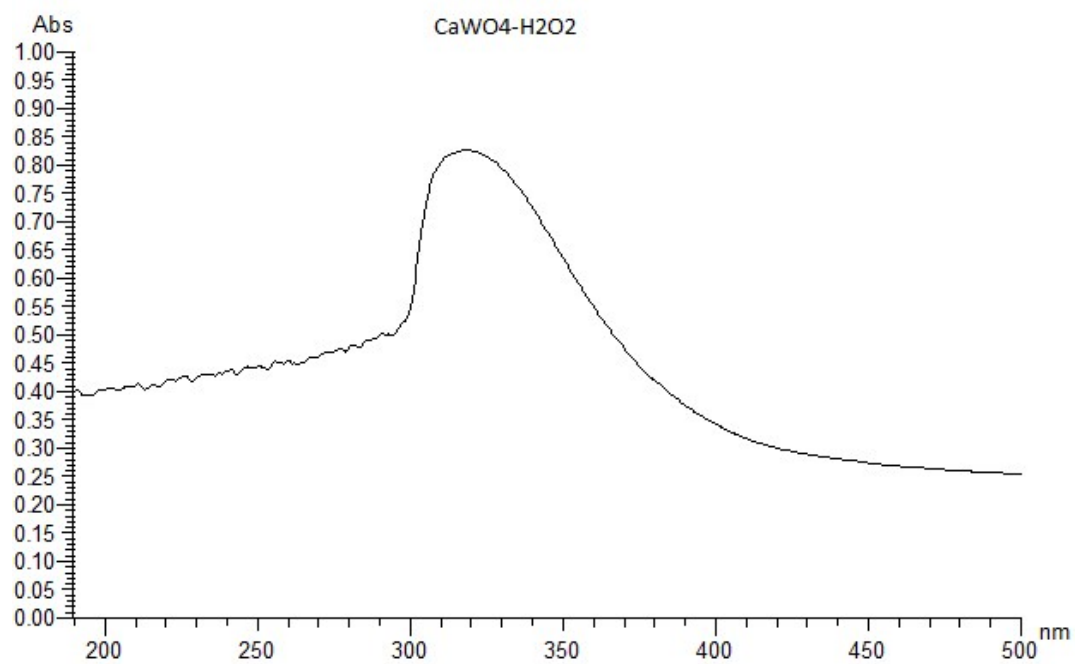

6. Photographs and IR Spectra of  $\text{CaWO}_4$  before and after Five cycles of Oxidation

a)  $\text{CaWO}_4$  prior to oxidations

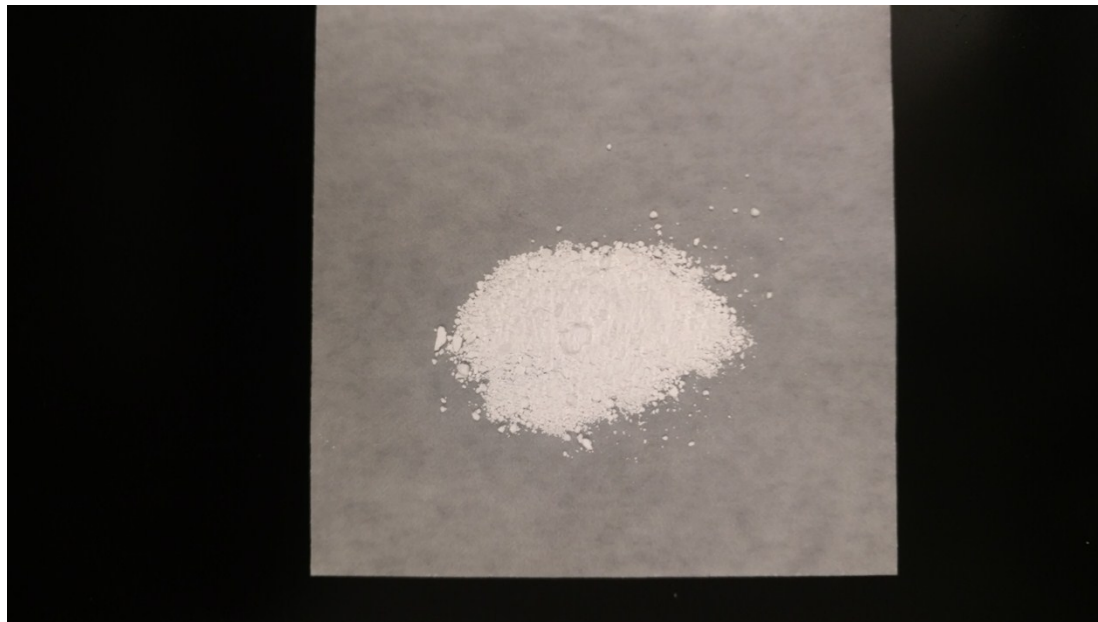

b)  $\text{CaWO}_4$  after five cycles of oxidations

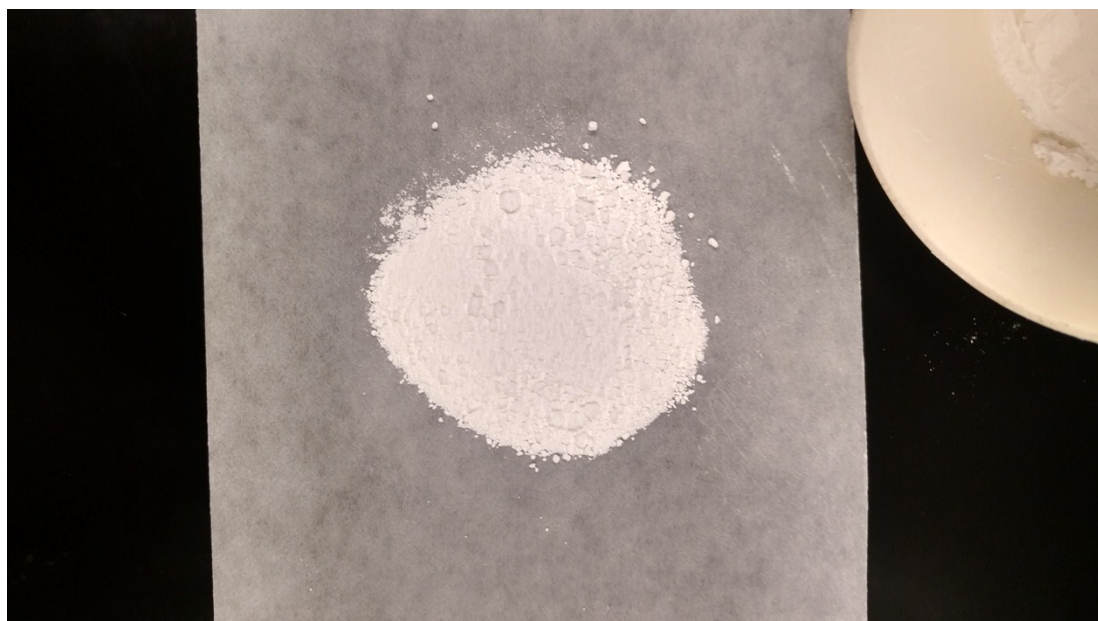

c) Overlay of IR Spectra of  $\text{CaWO}_4$  before (A) and after (B) five cycles of oxidation

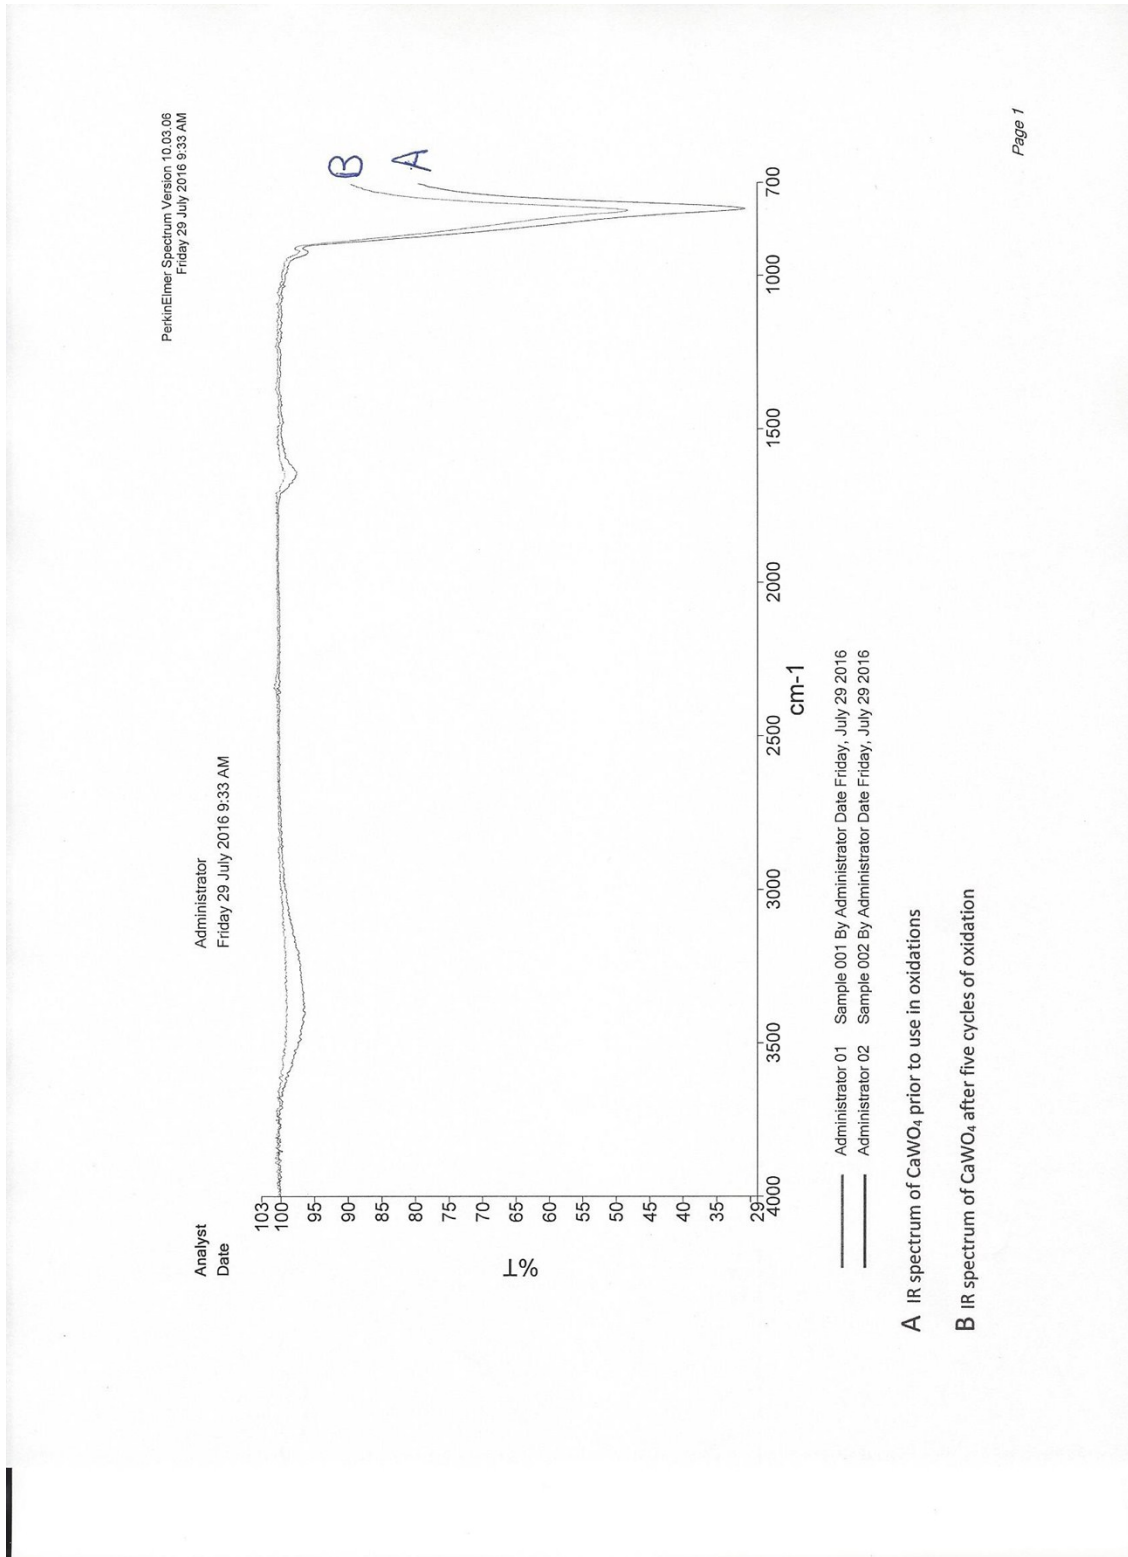

7. All NMR spectra were obtained on a Bruker 300 MHz spectrometer. All Infrared spectra were obtained on a Perkin Elmer Frontier FTIR.

Nitrobenzene:  $^1\text{H-NMR}$  ( $\text{CDCl}_3$ )

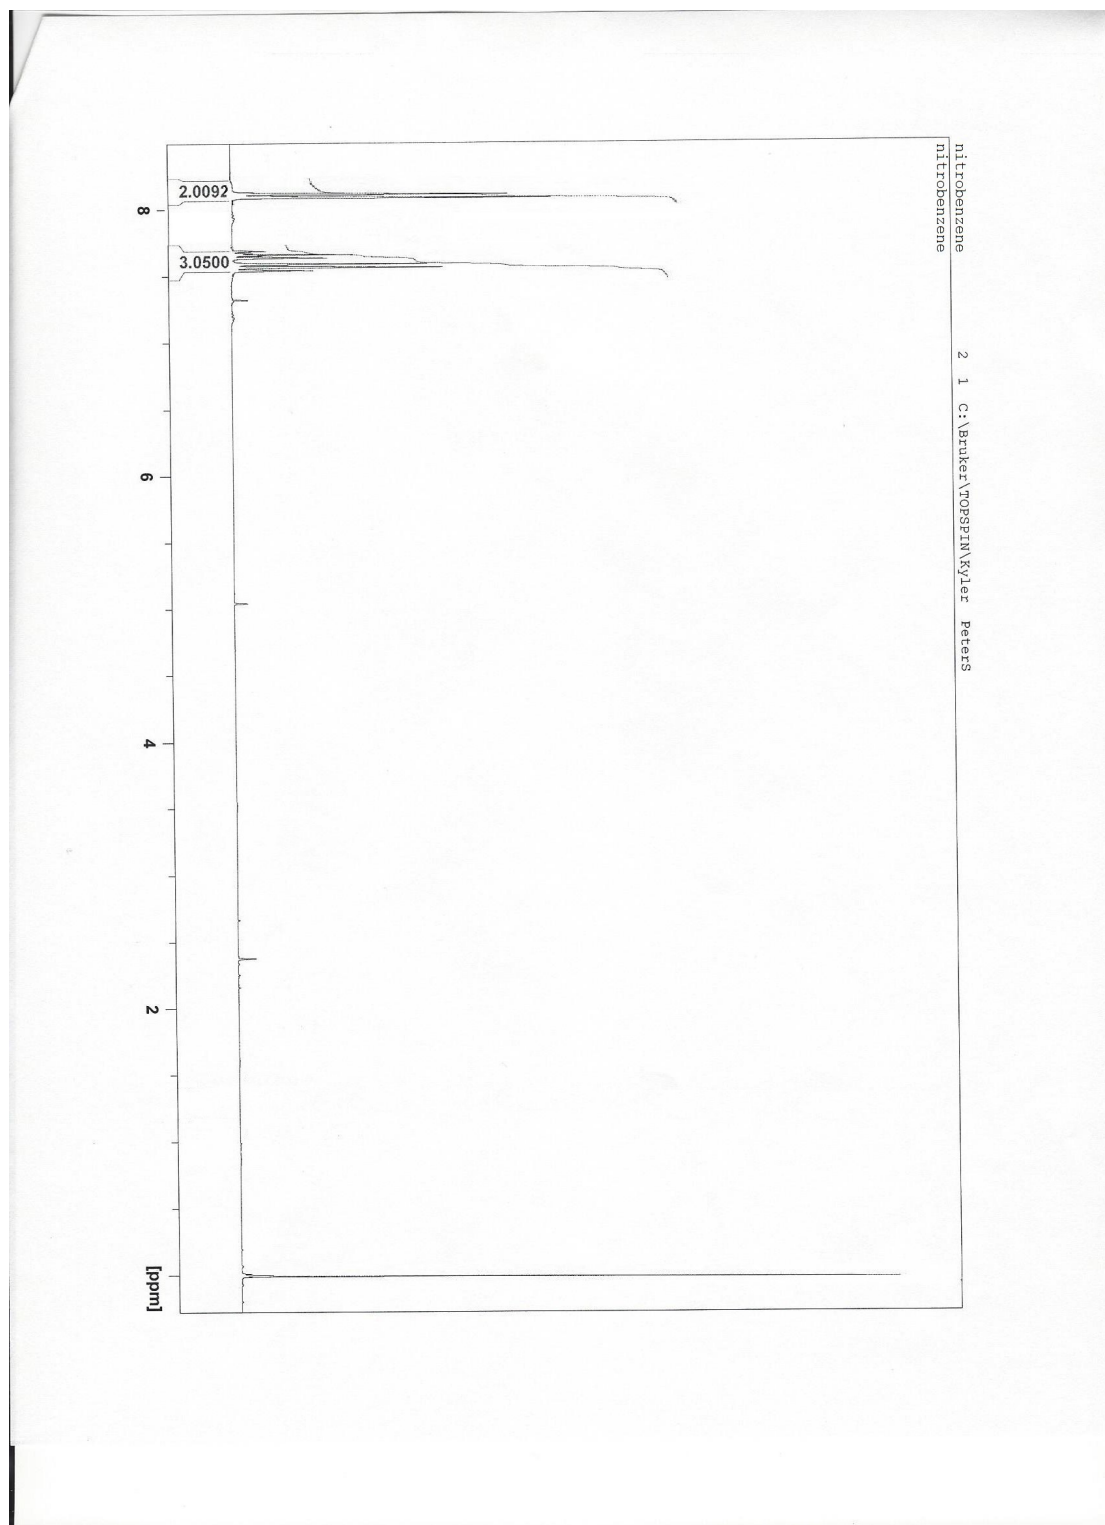

Nitrobenzene:  $^{13}\text{C}$ -NMR ( $\text{CDCl}_3$ )

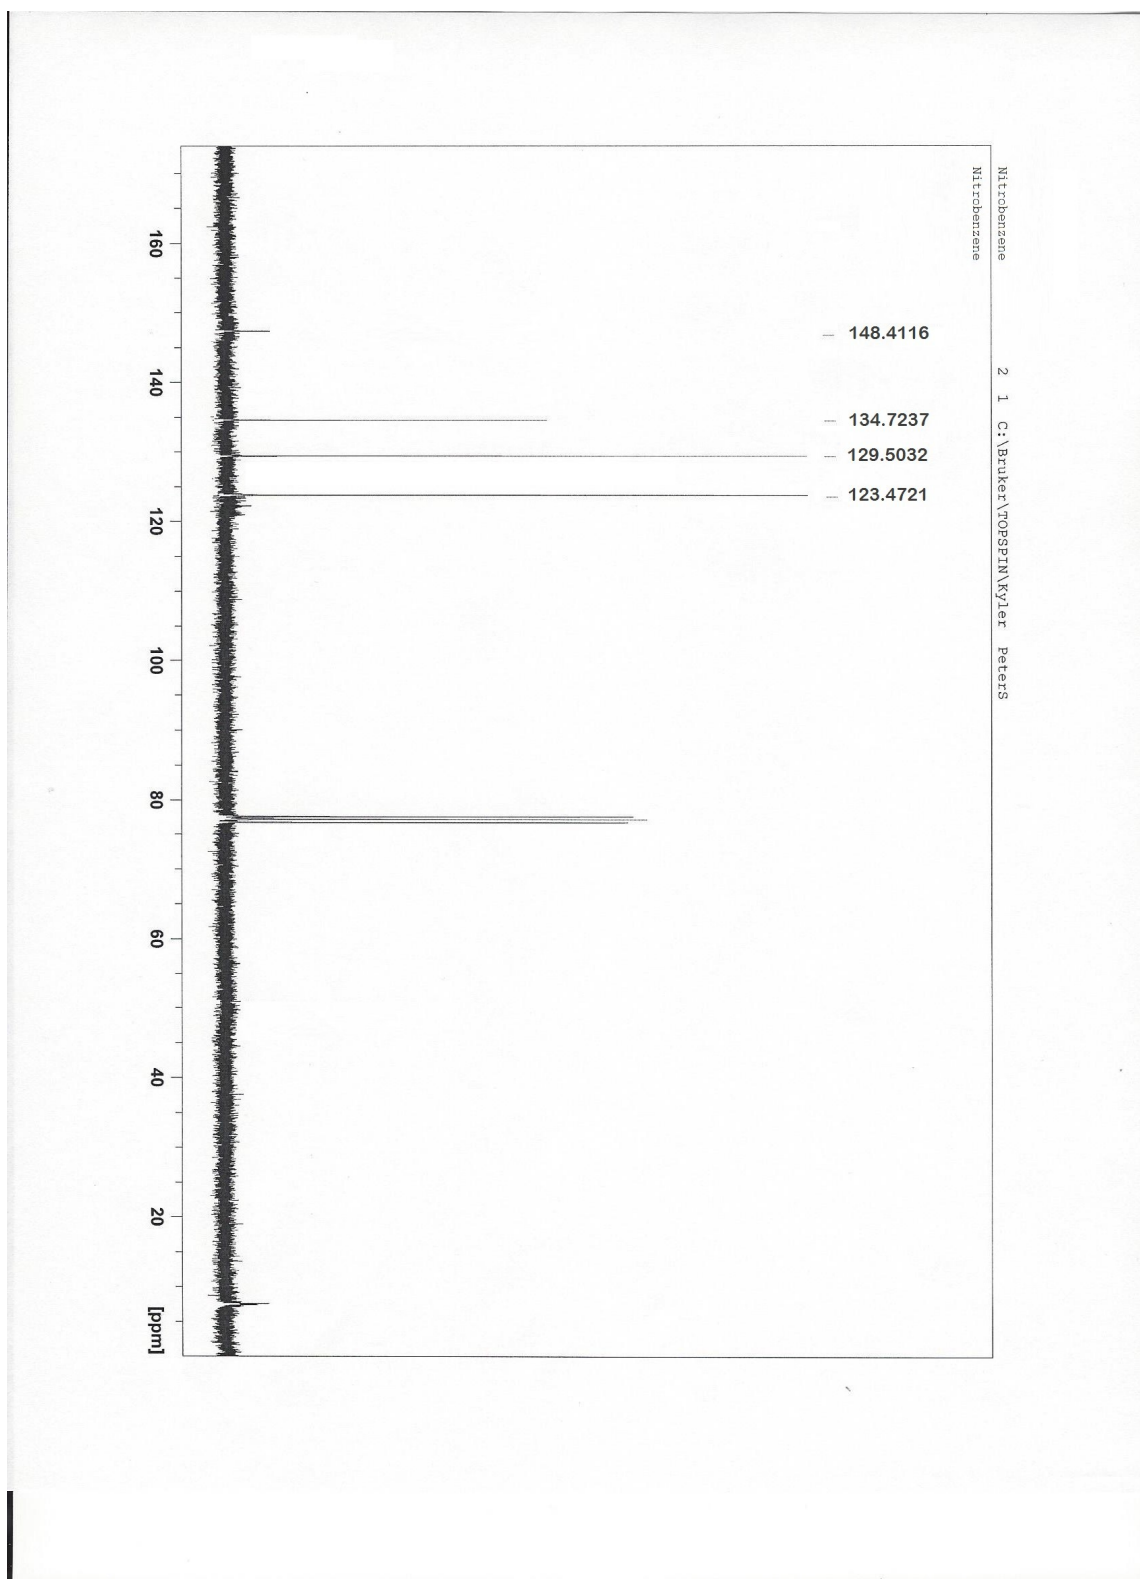



Nitrobenzene: IR

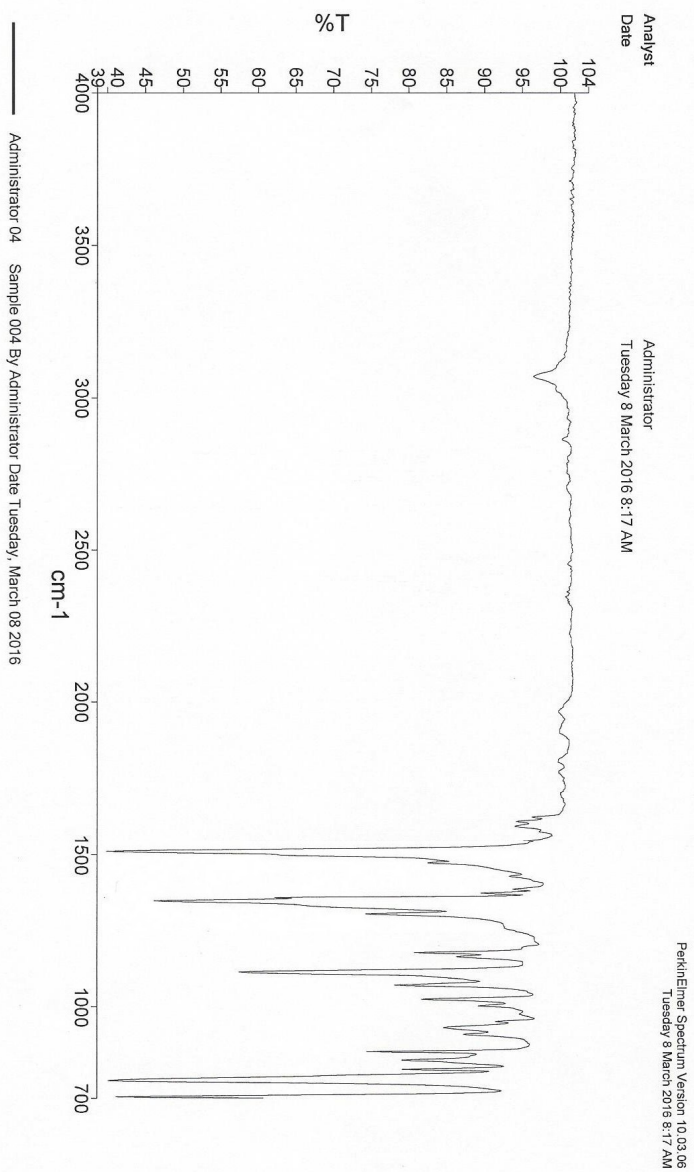

4-nitrotoluene:  $^1\text{H-NMR}$  ( $\text{CDCl}_3$ )

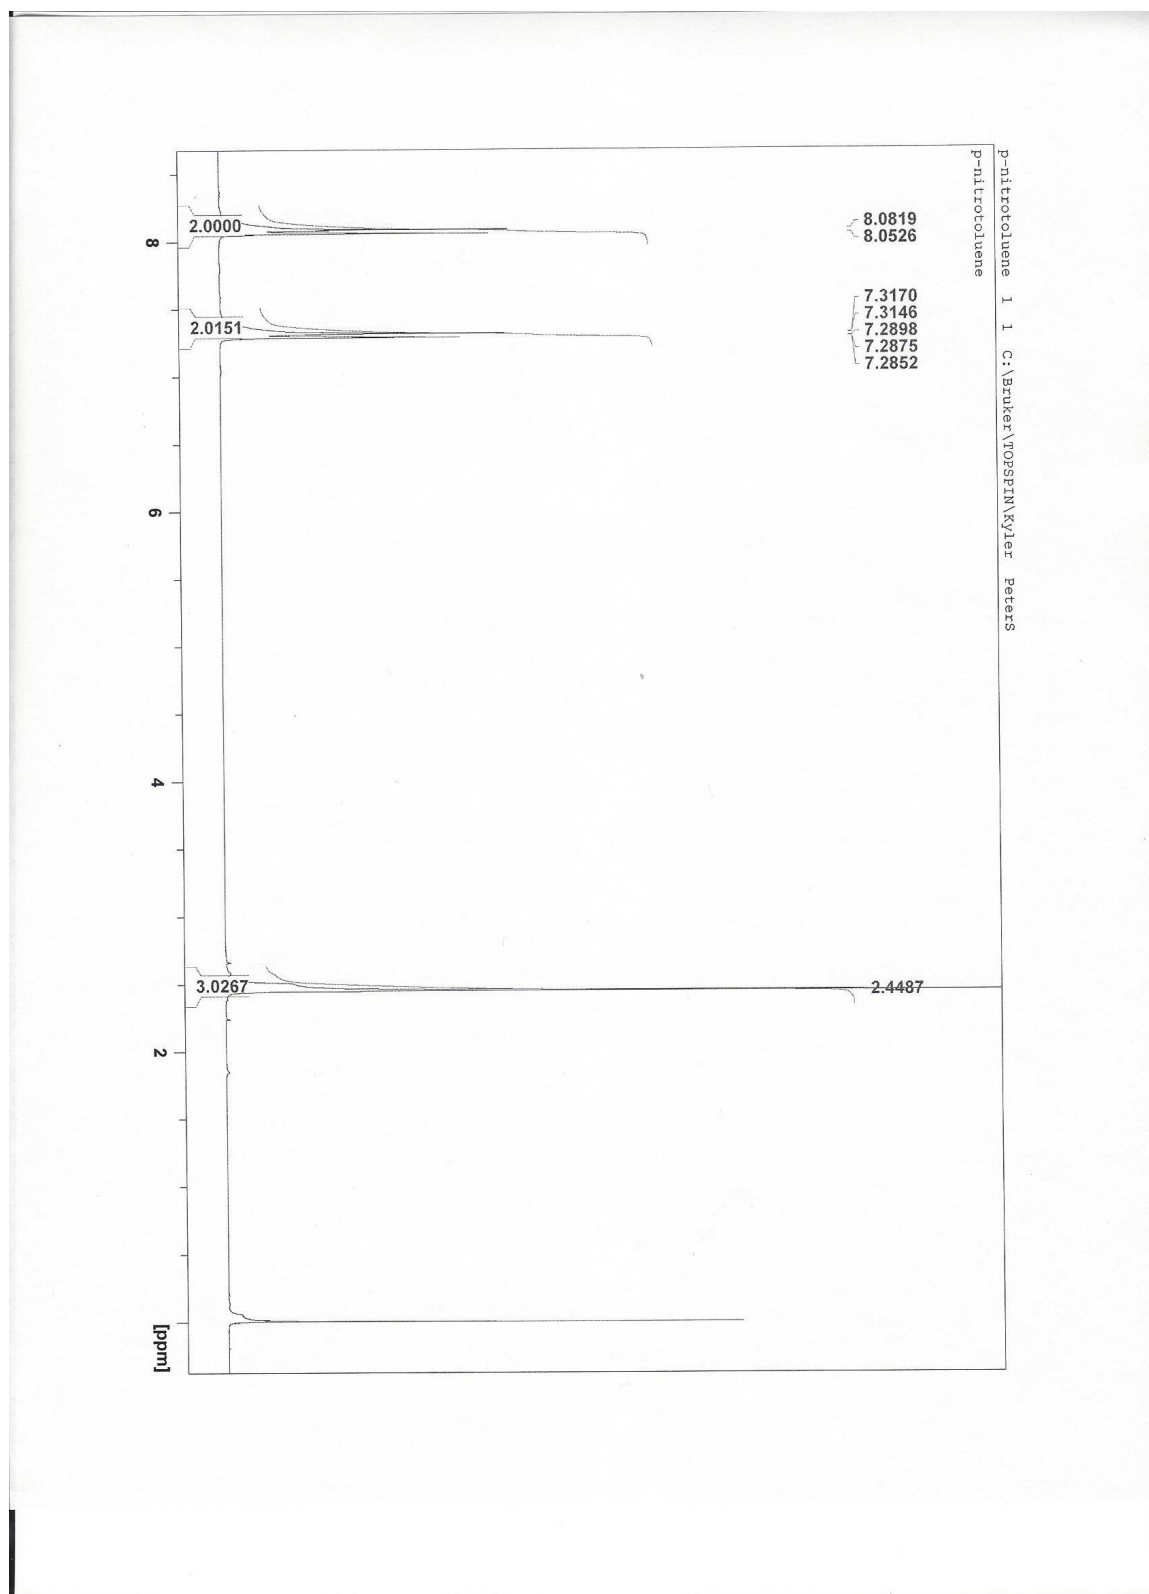

4-nitrotoluene:  $^{13}\text{C}$ -NMR ( $\text{CDCl}_3$ )

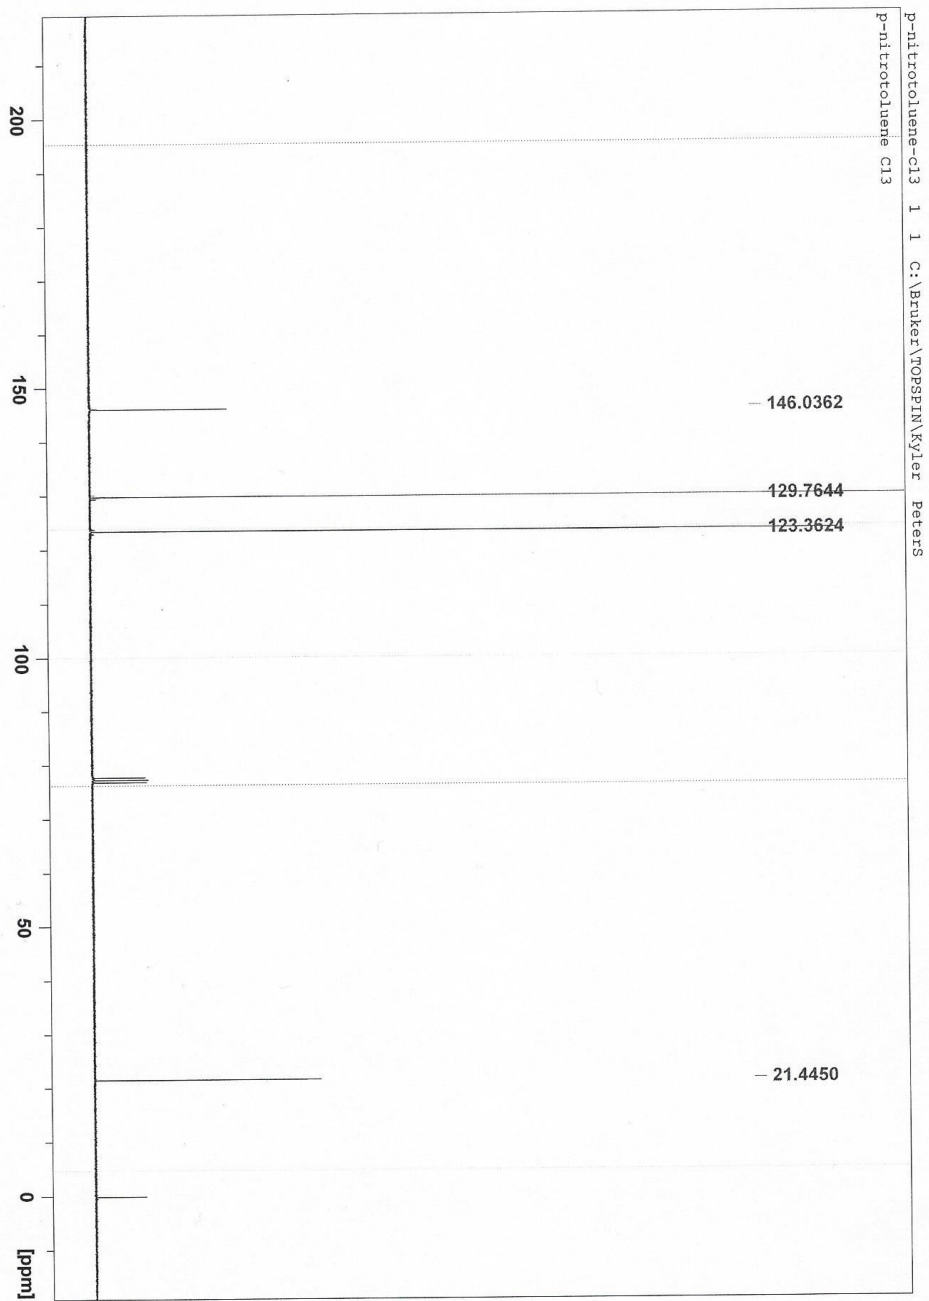

4-nitrotoluene: IR

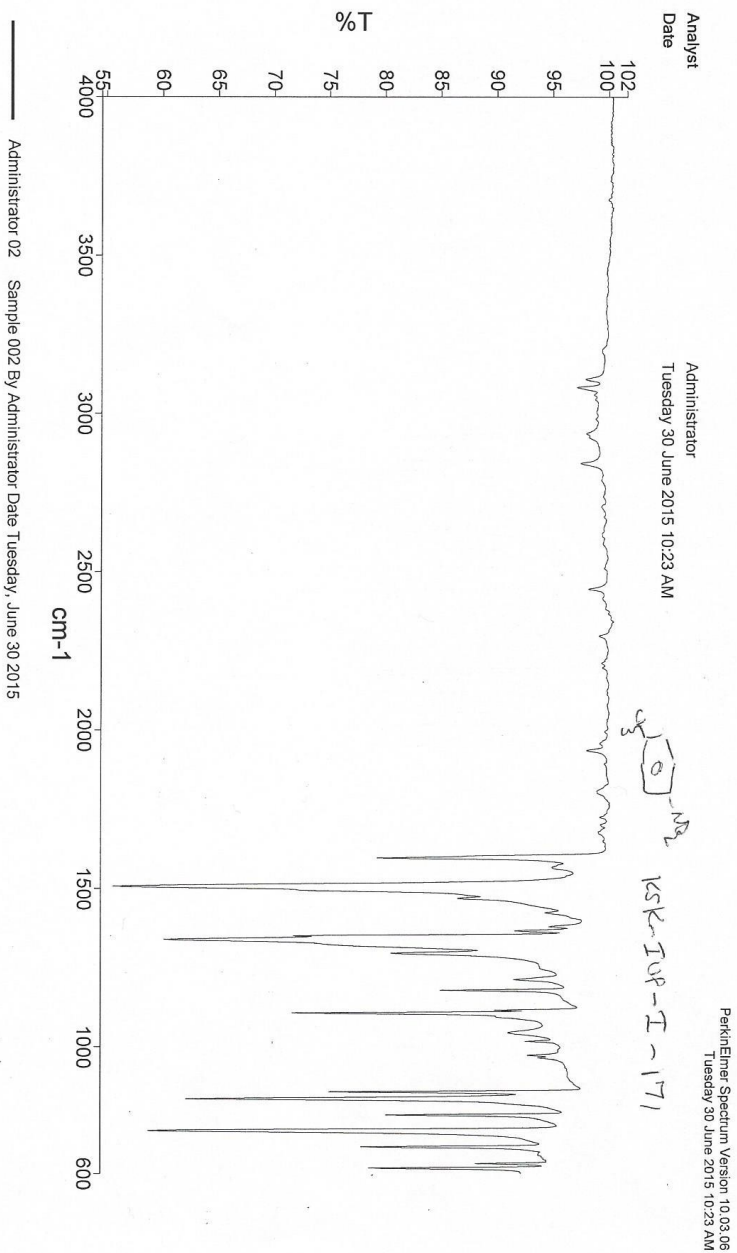

3-nitroisoxazole:  $^1\text{H-NMR}$  ( $\text{CDCl}_3$ )

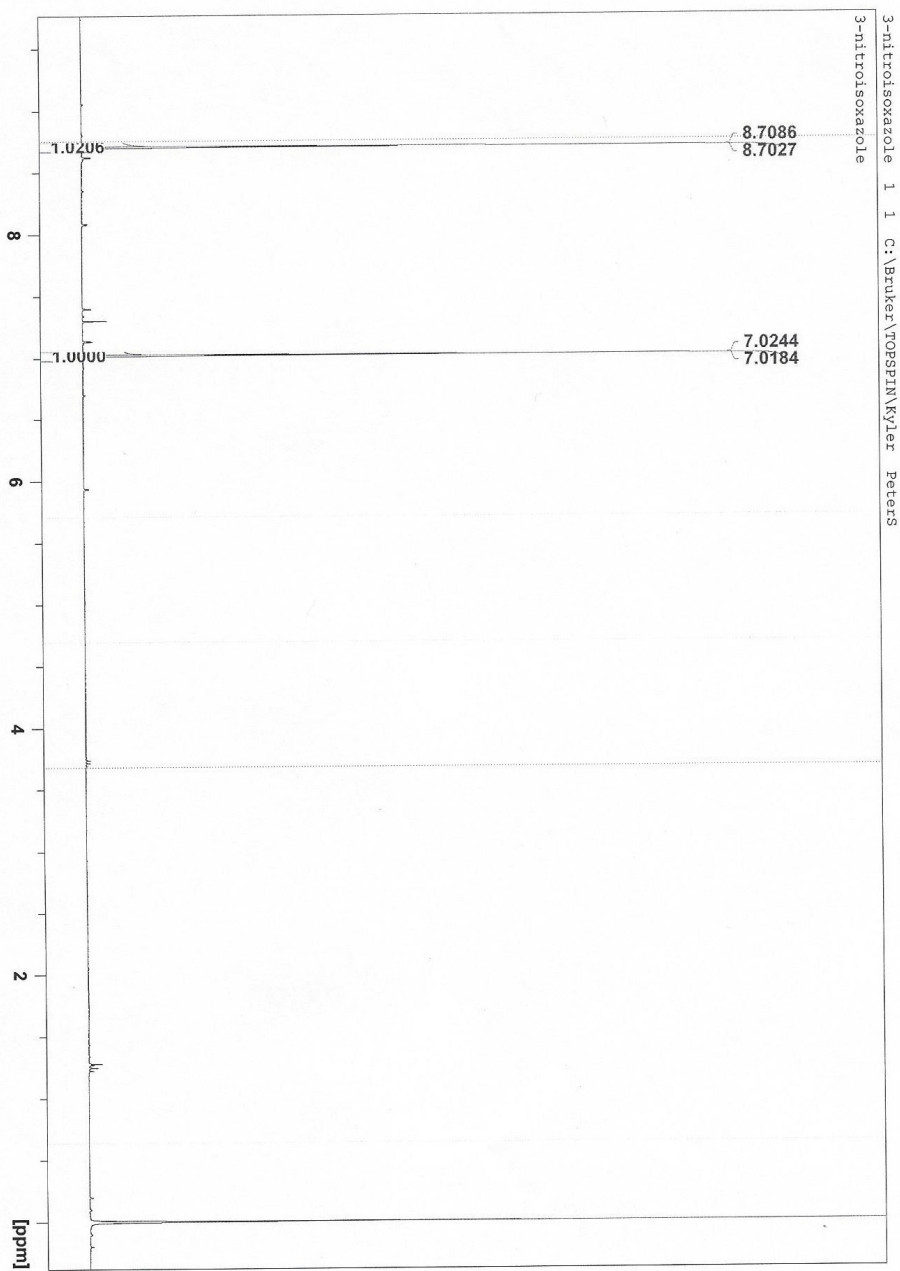

3-nitroisoxazole:  $^{13}\text{C}$ -NMR ( $\text{CDCl}_3$ )

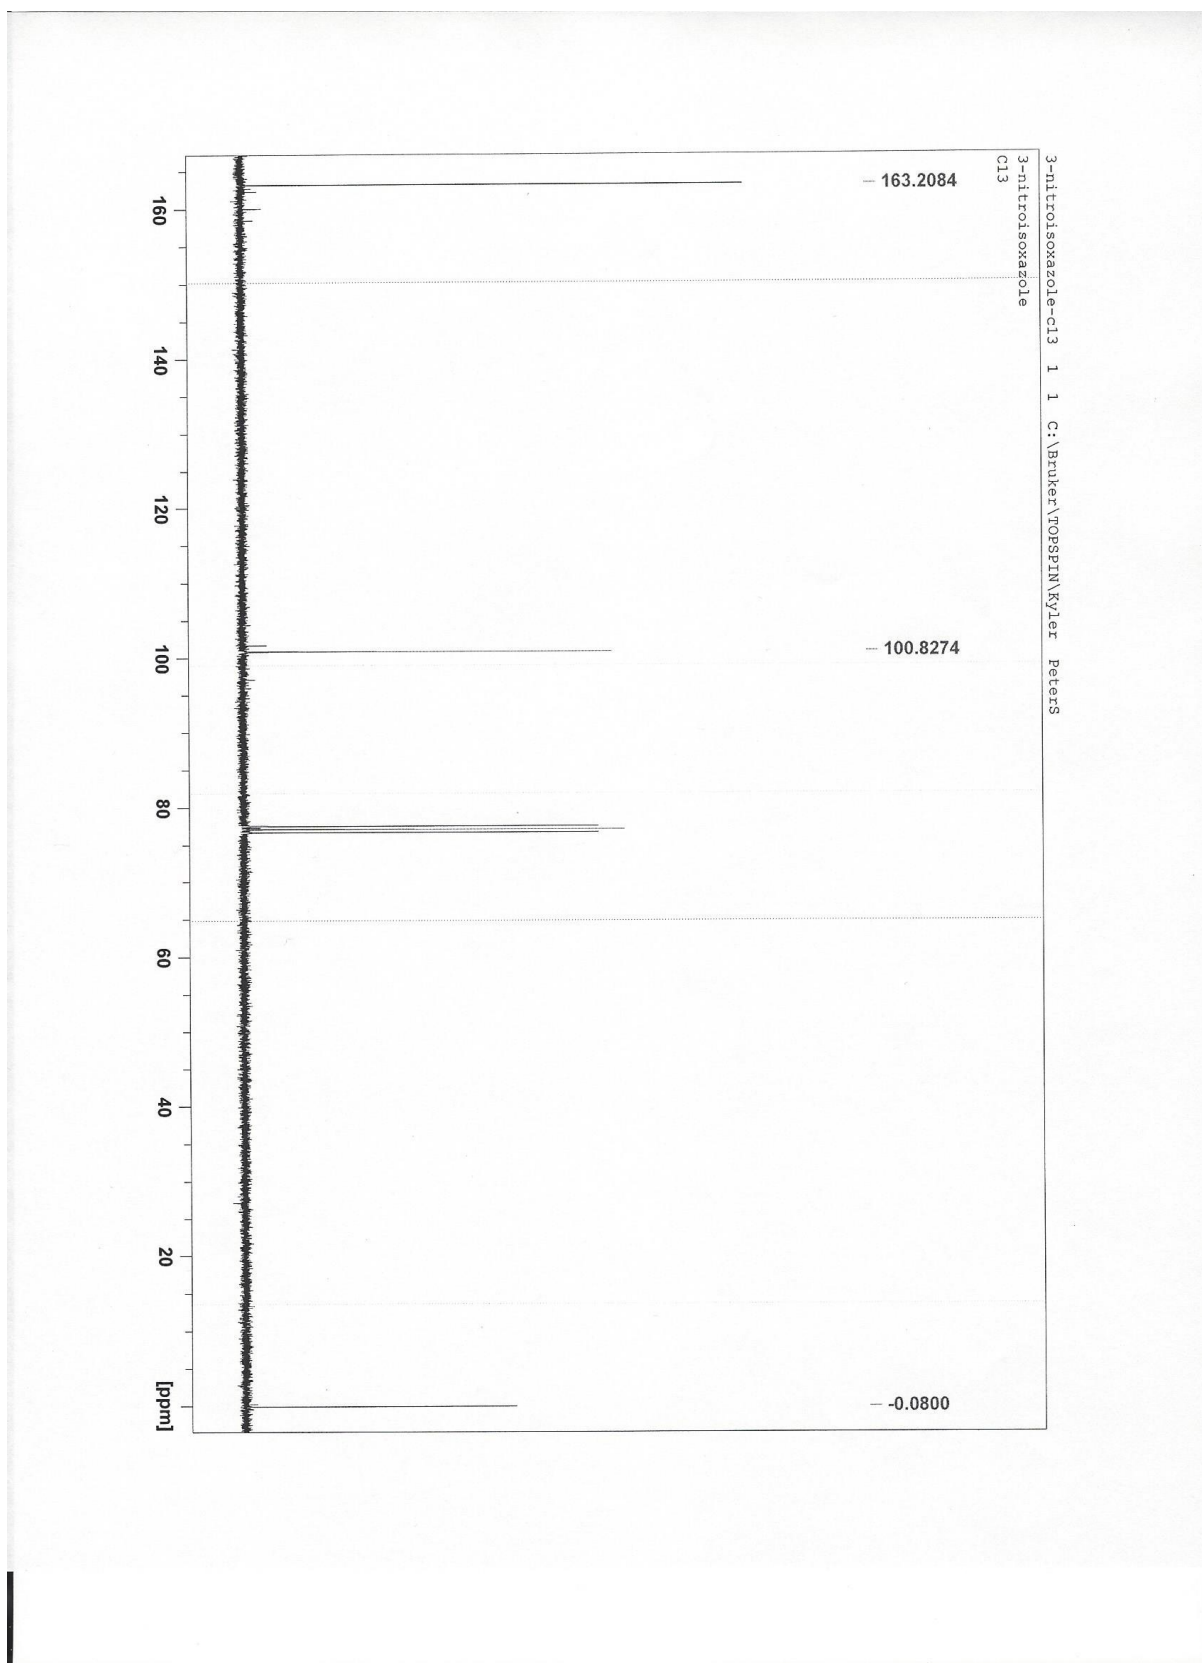

3-nitroisoxazole: IR

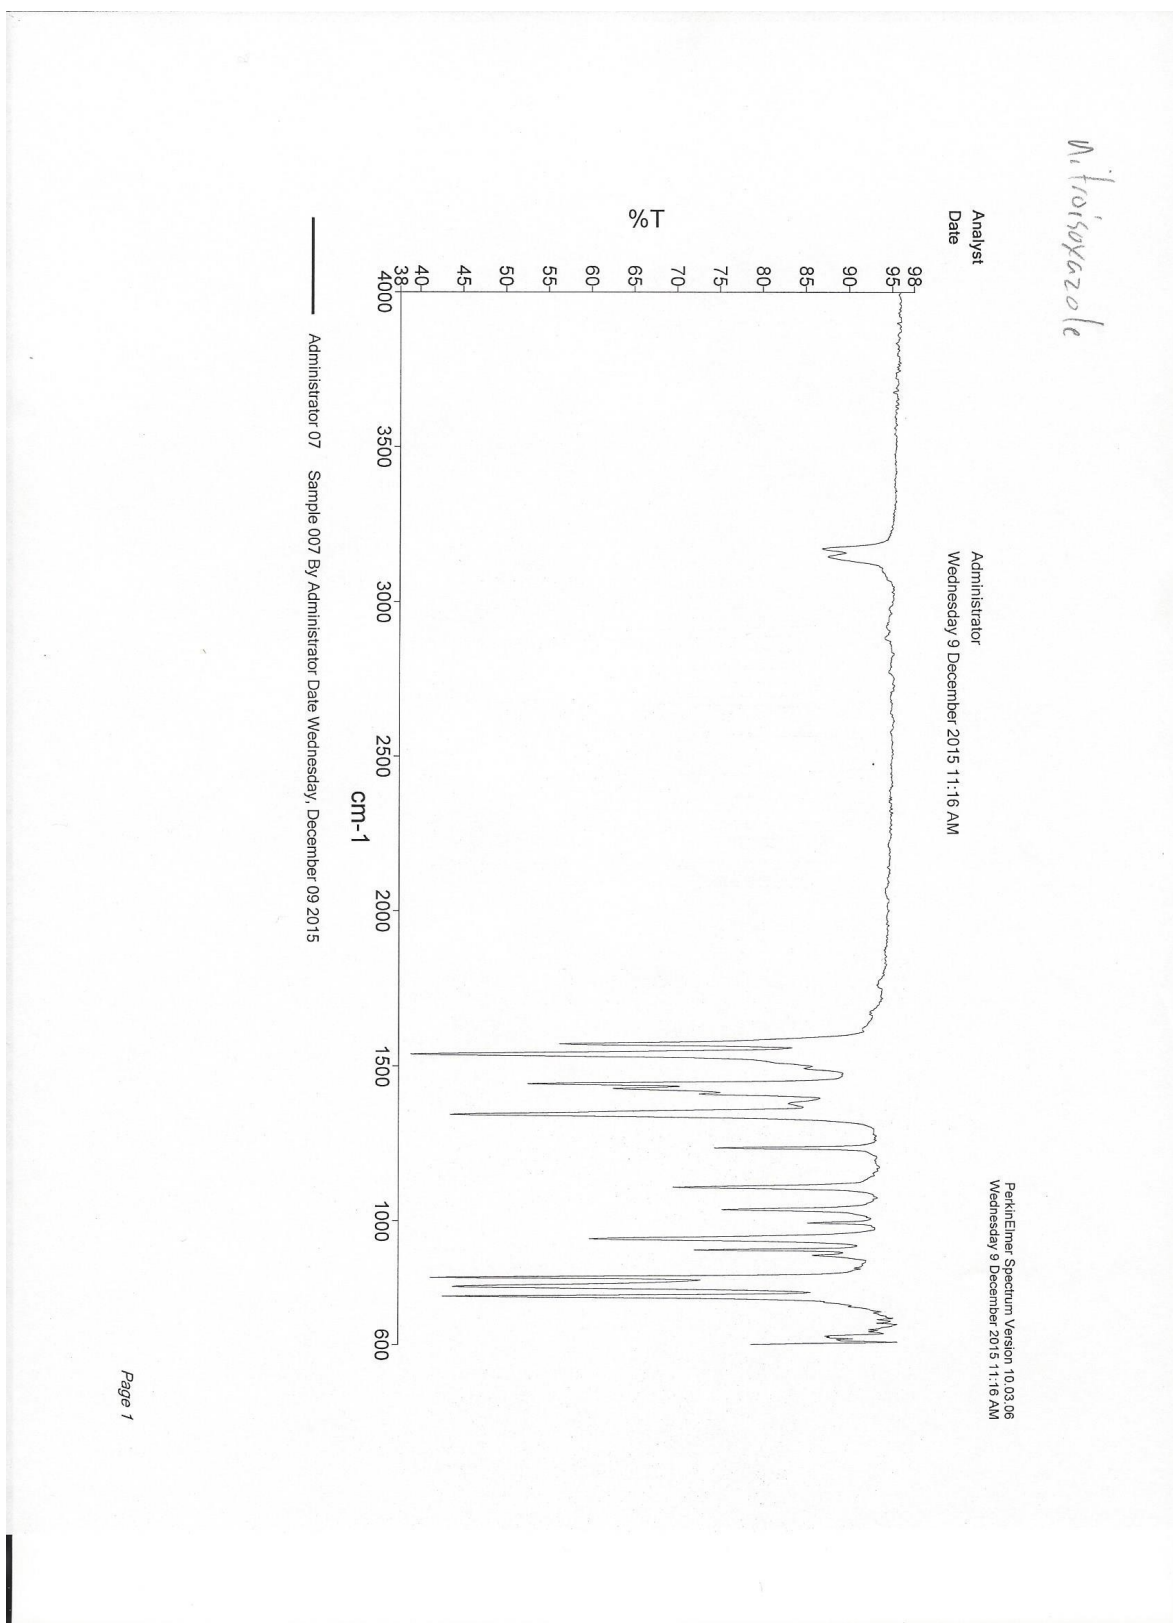

Cyclohexene oxide:  $^1\text{H-NMR}$  ( $\text{CDCl}_3$ )

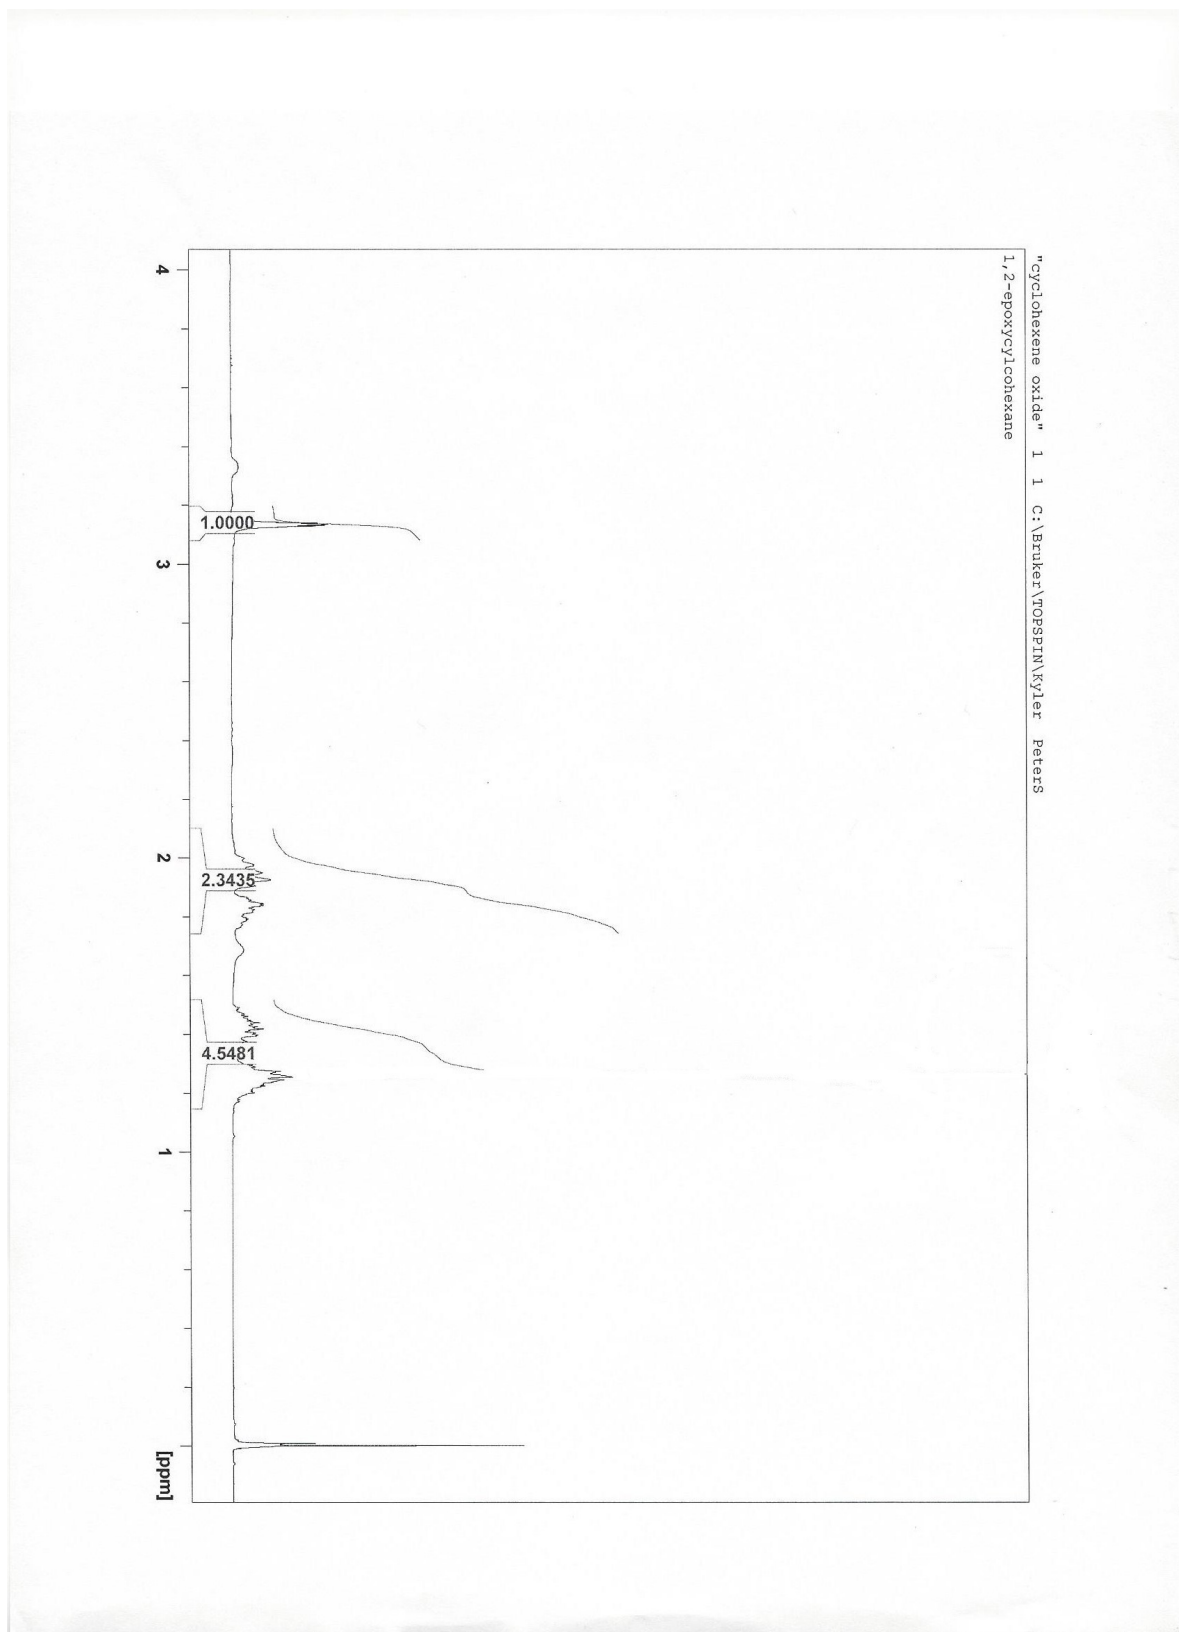



Cyclohexene oxide:  $^{13}\text{C}$ -NMR ( $\text{CDCl}_3$ )

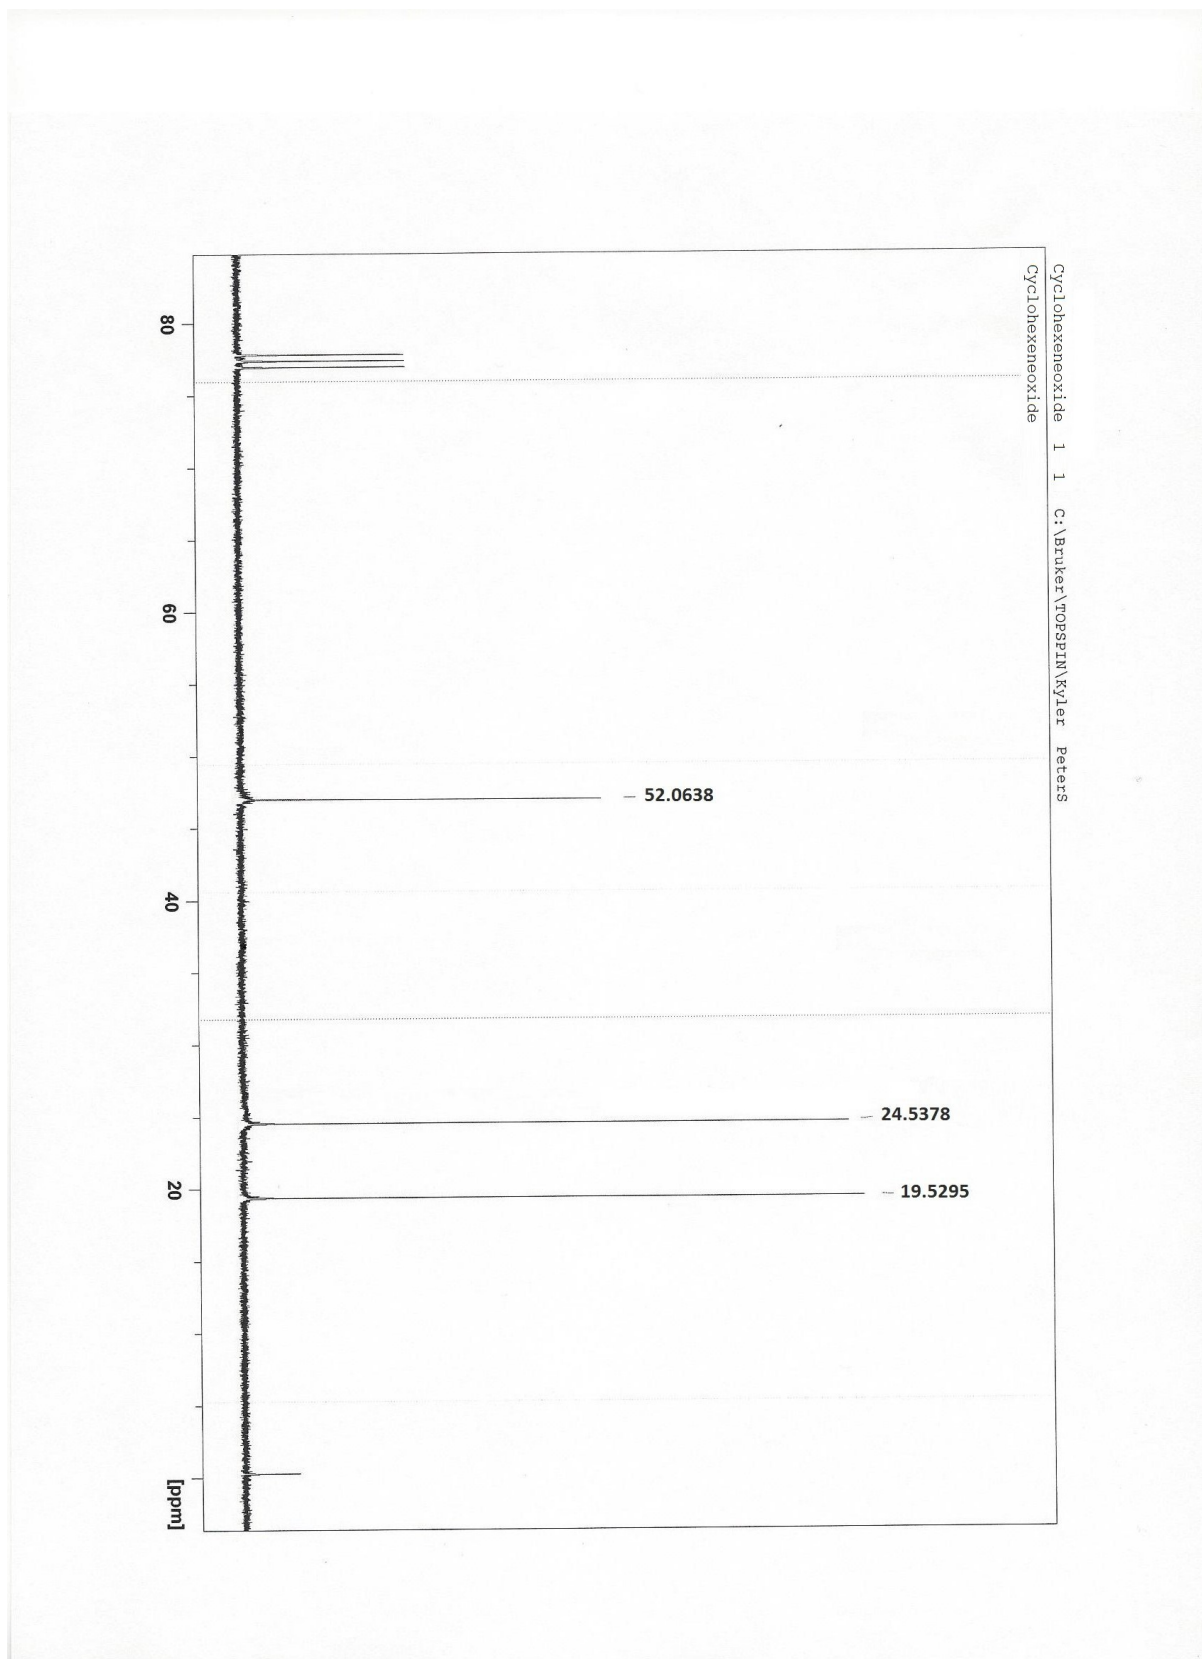

Cyclohexene oxide: IR

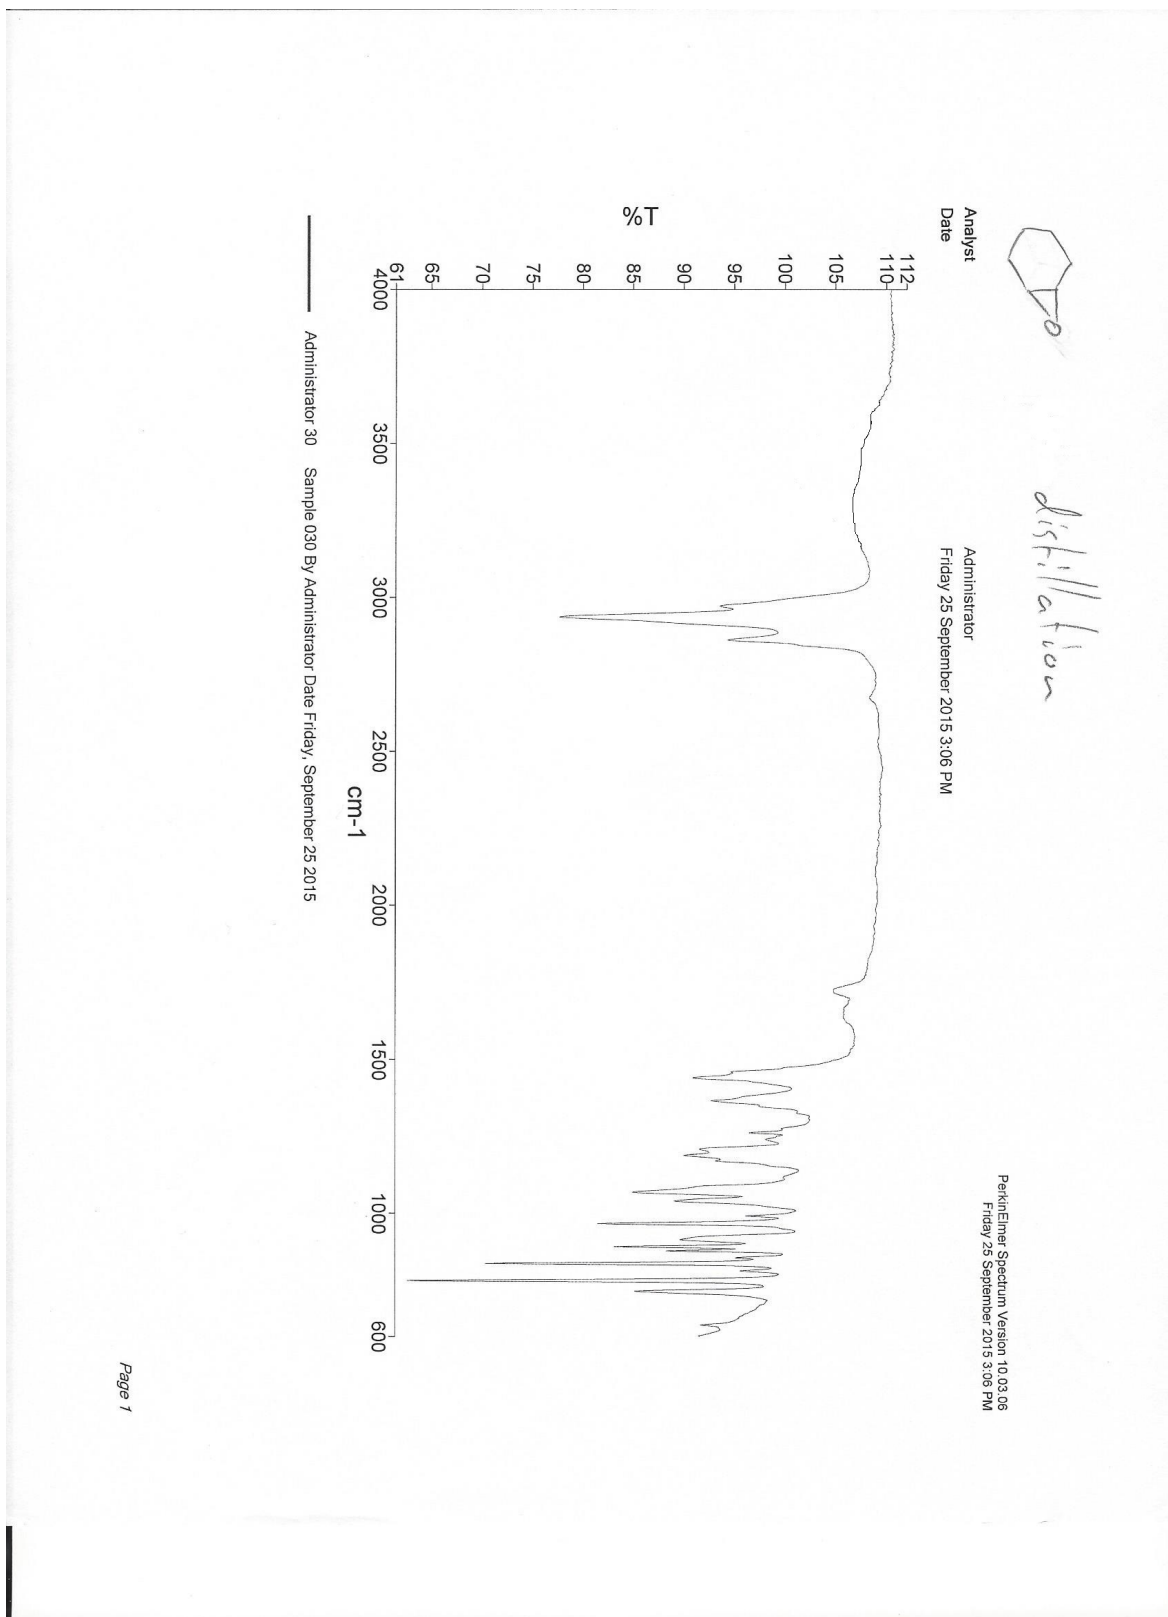

Expoxynorbornane:  $^1\text{H-NMR}$  ( $\text{CDCl}_3$ )

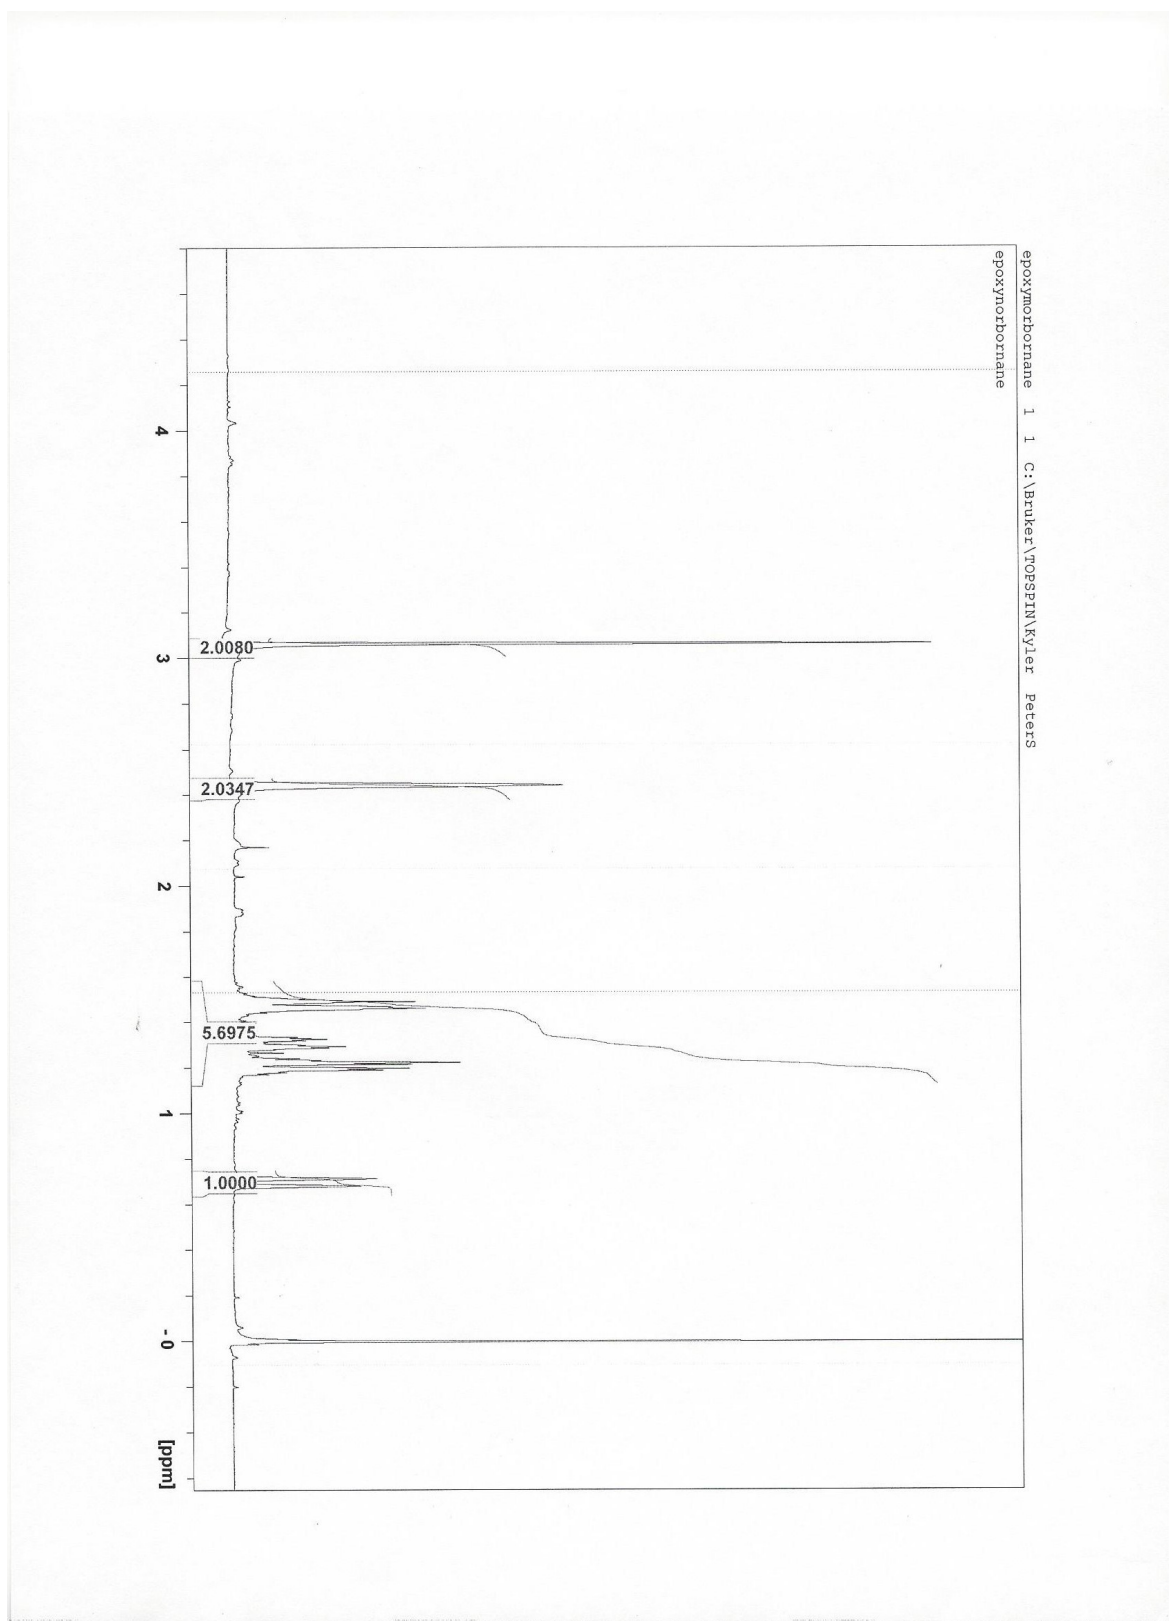

Epoxyborbonane:  $^{13}\text{C}$ -NMR ( $\text{CDCl}_3$ )

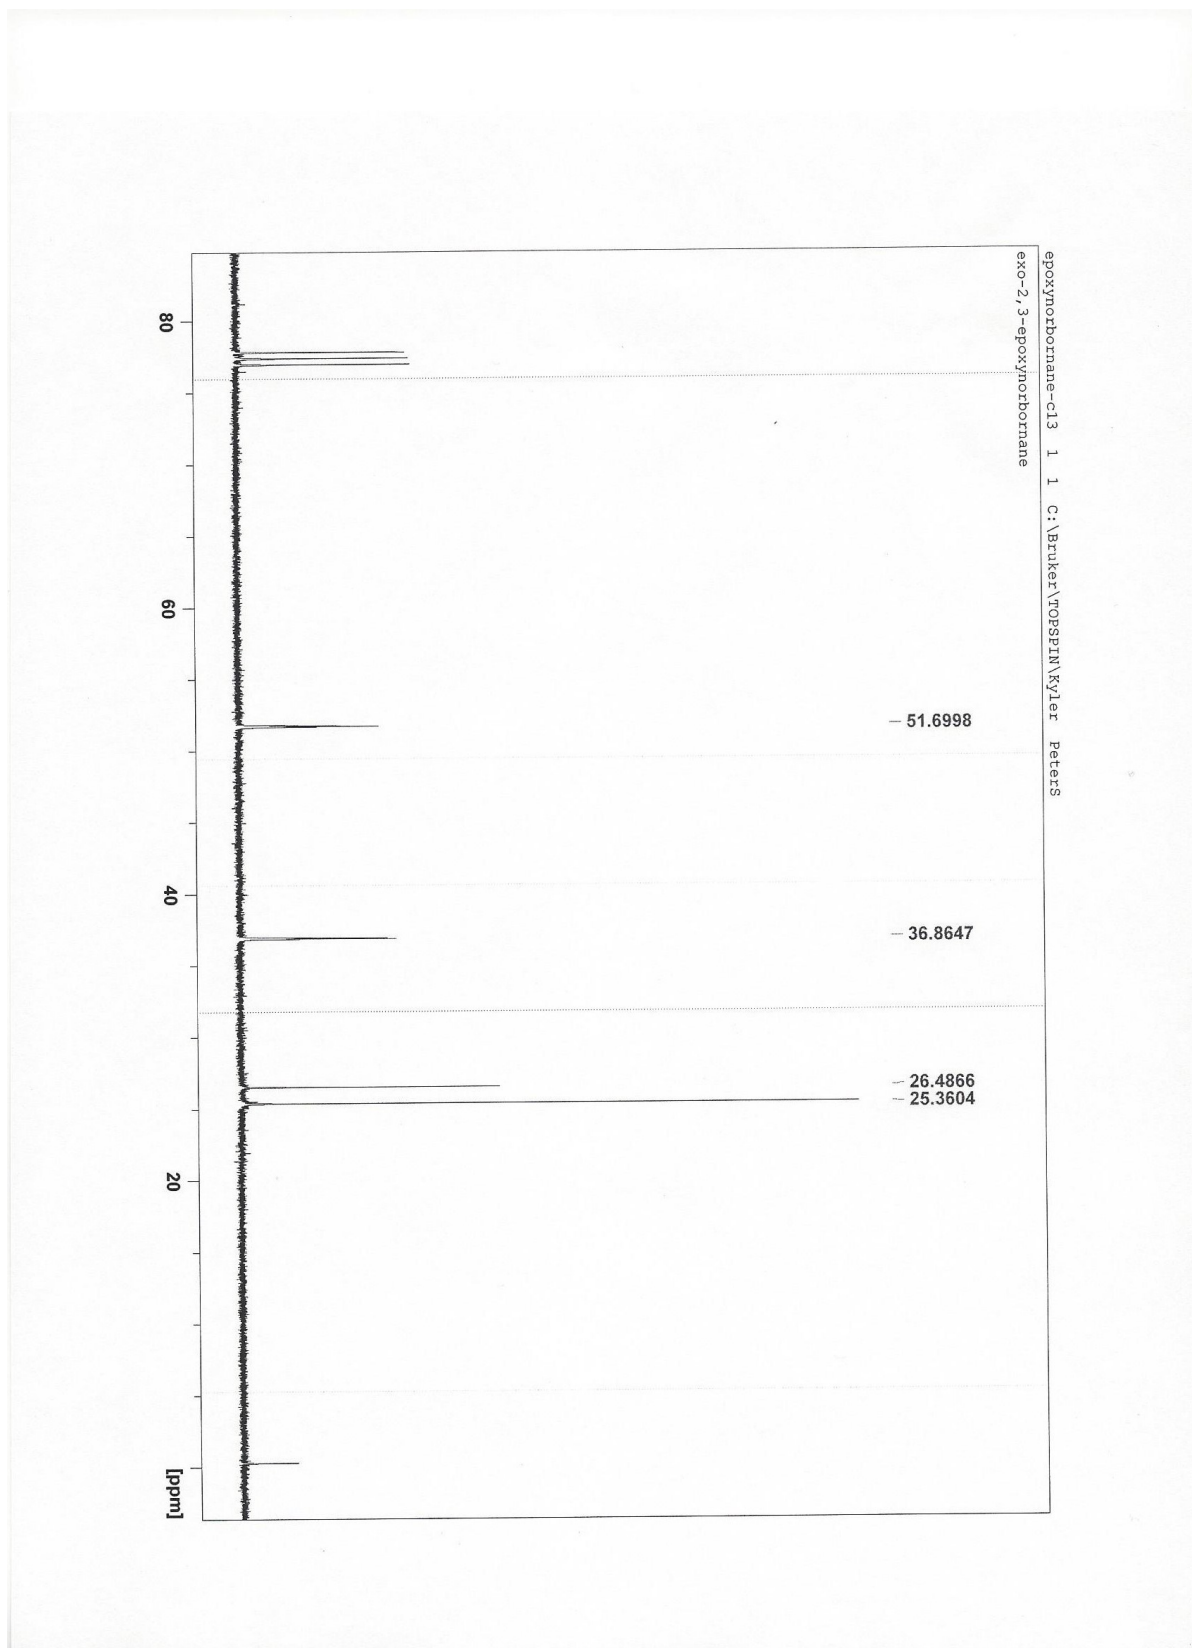

Epoxybornane: IR

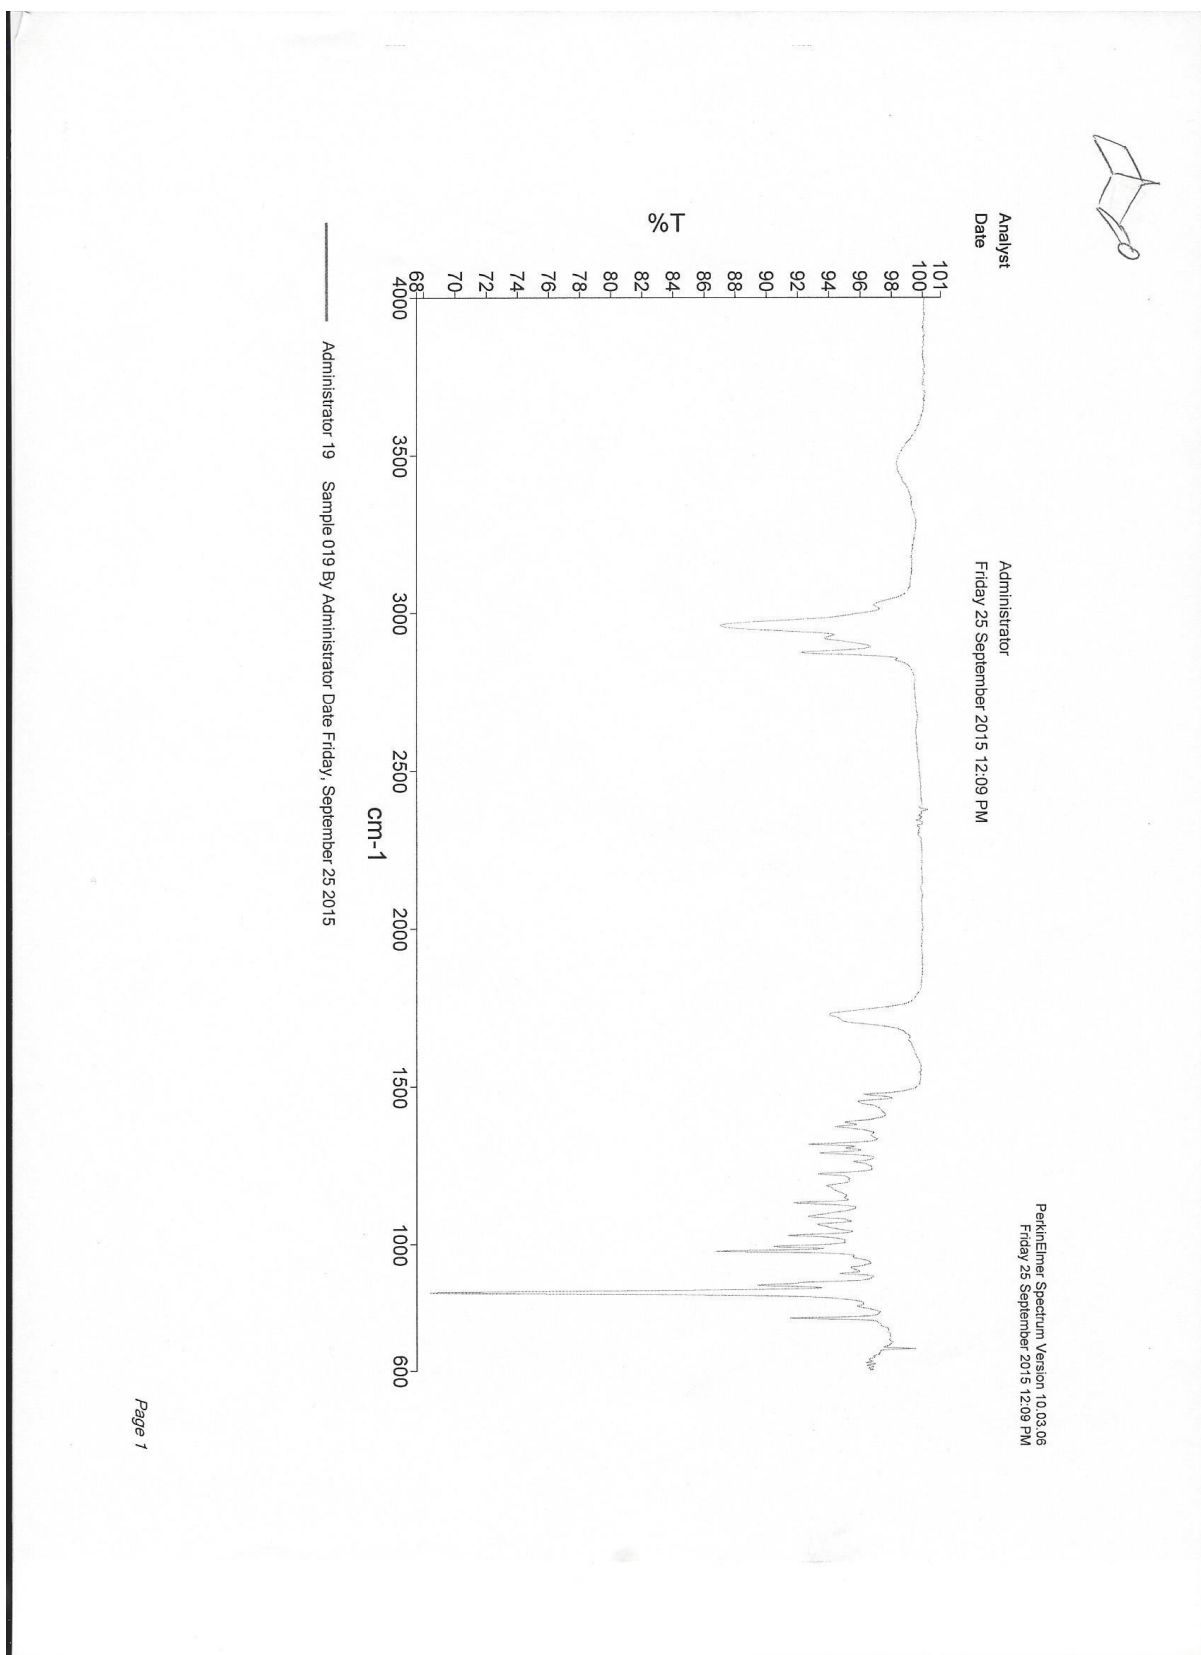

Cyclohexanone:  $^1\text{H-NMR}$  ( $\text{CDCl}_3$ )

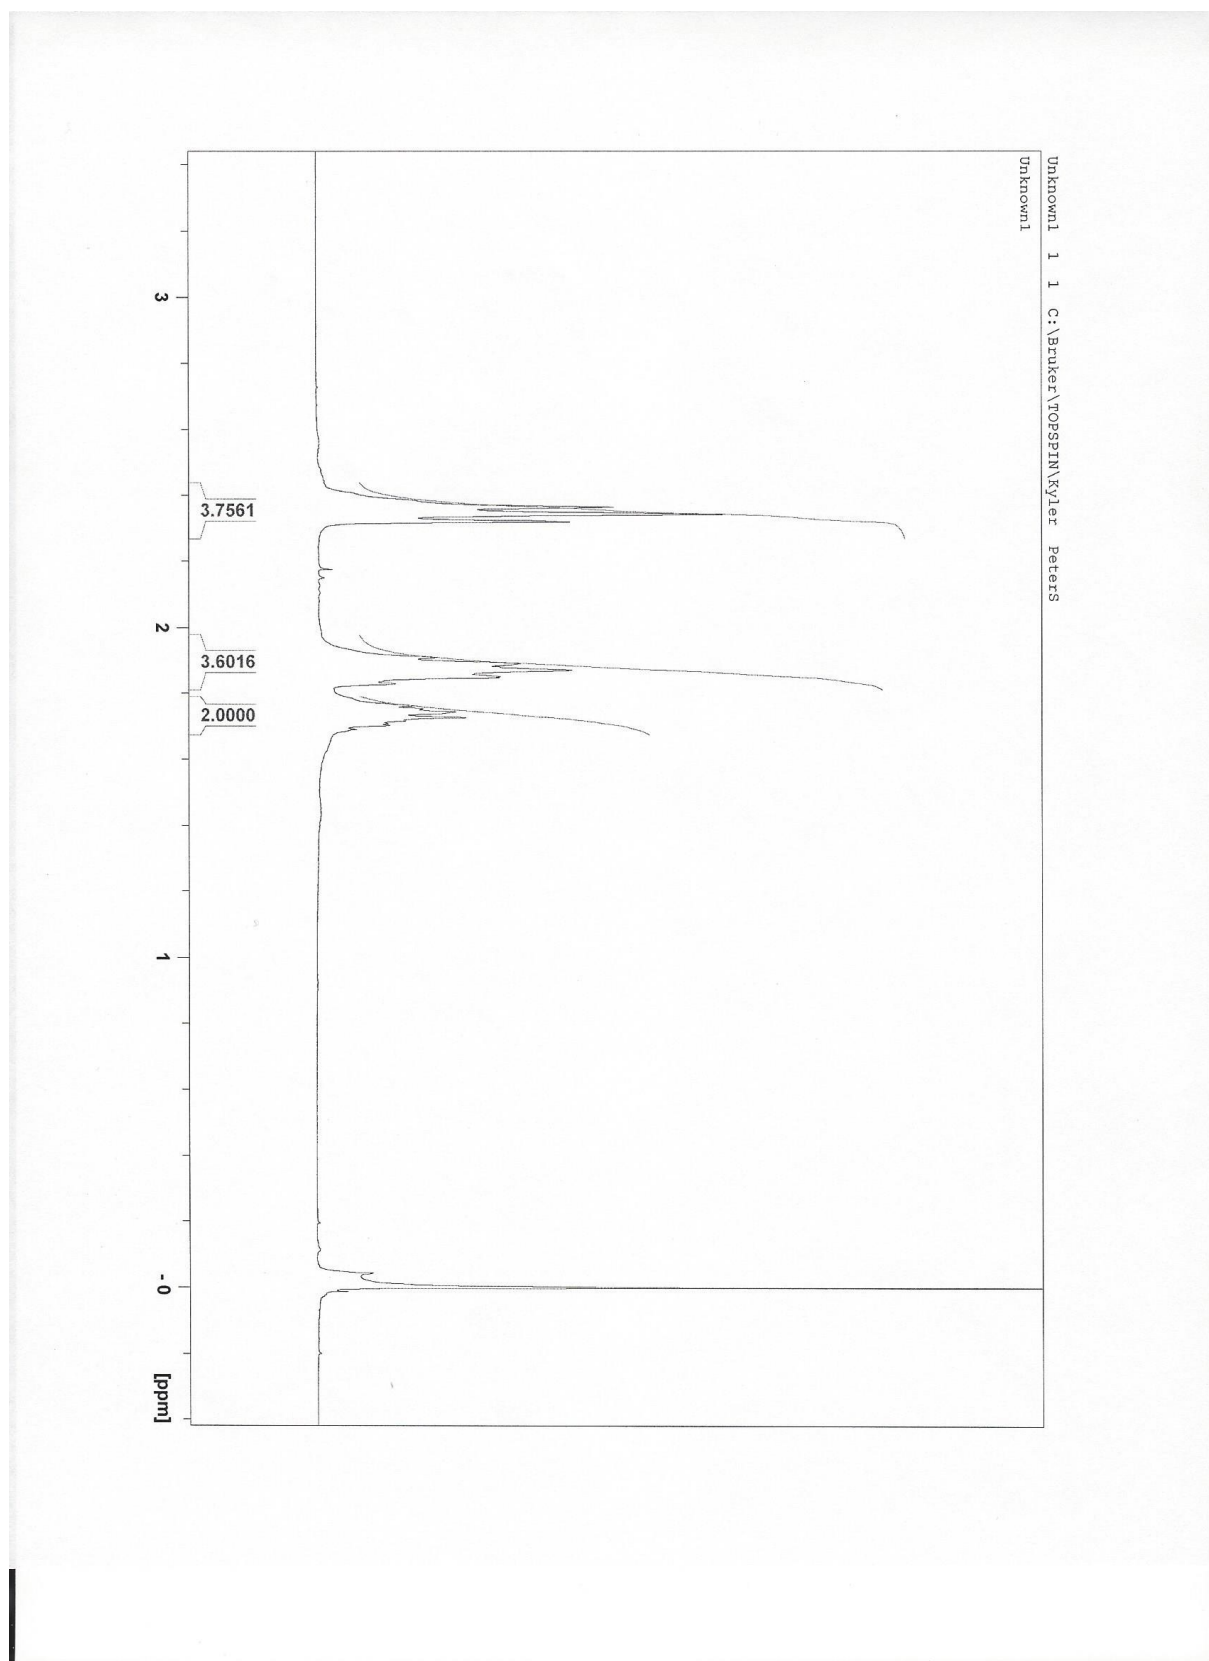

Cyclohexanone:  $^{13}\text{C}$ -NMR ( $\text{CDCl}_3$ )

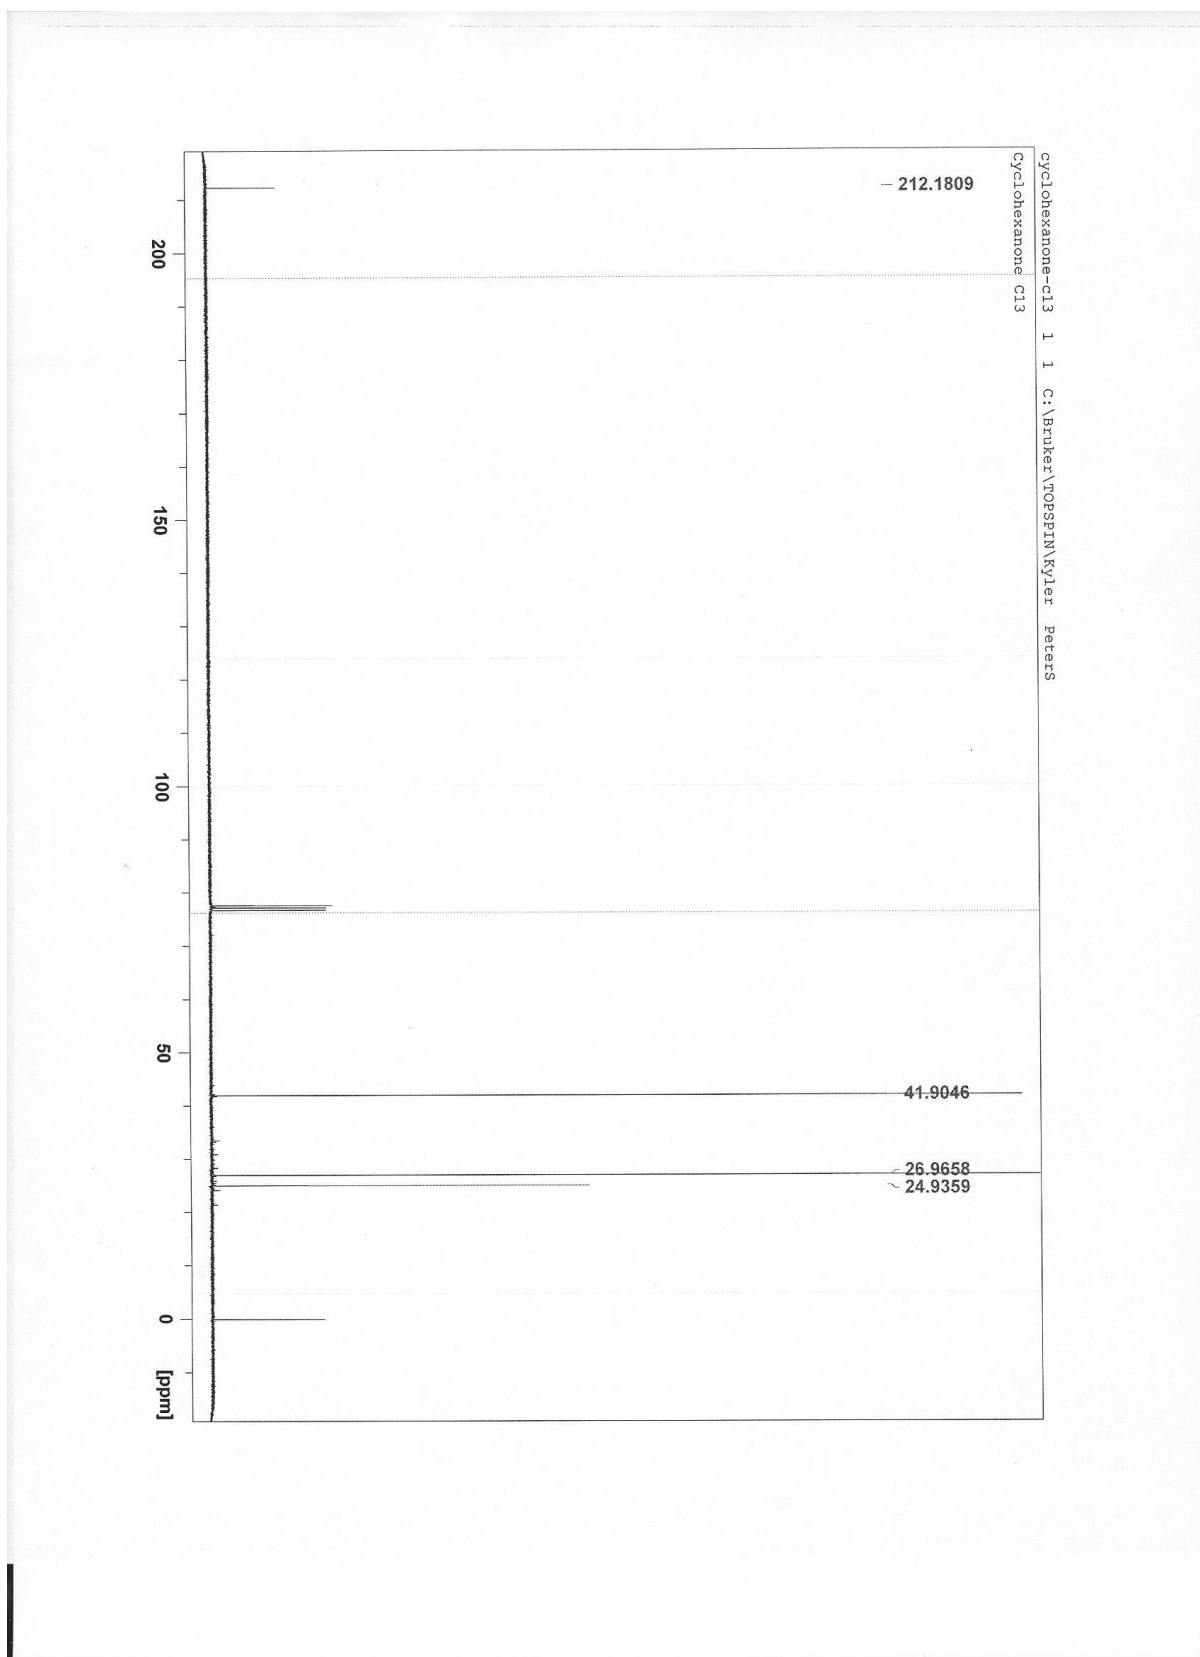

# Cyclohexanone: IR

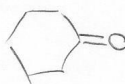

Analyst  
Date

Administrator  
Friday, September 25, 2015 2:48 PM

PerkinElmer Spectrum Version 10.03.06  
Friday, 25 September 2015 2:48 PM

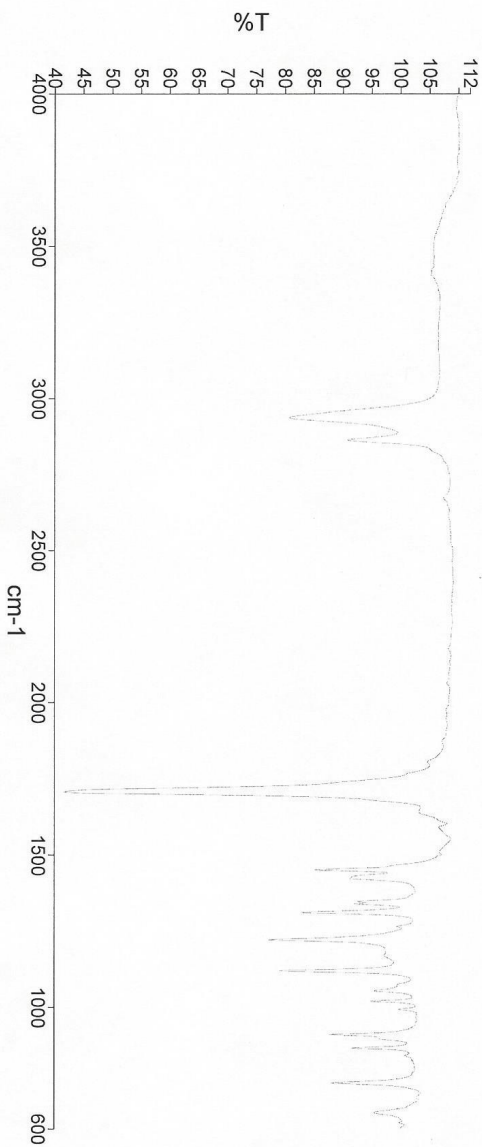

| Sample Name      | Description                                                 | Quality Checks                                                    | Pathlength (mm) |
|------------------|-------------------------------------------------------------|-------------------------------------------------------------------|-----------------|
| Administrator 26 | Sample 026 By Administrator Date Friday, September 25, 2015 | The Quality Checks give rise to multiple warnings for the sample. | 1               |



3-pentanone:  $^1\text{H-NMR}$  ( $\text{CDCl}_3$ )

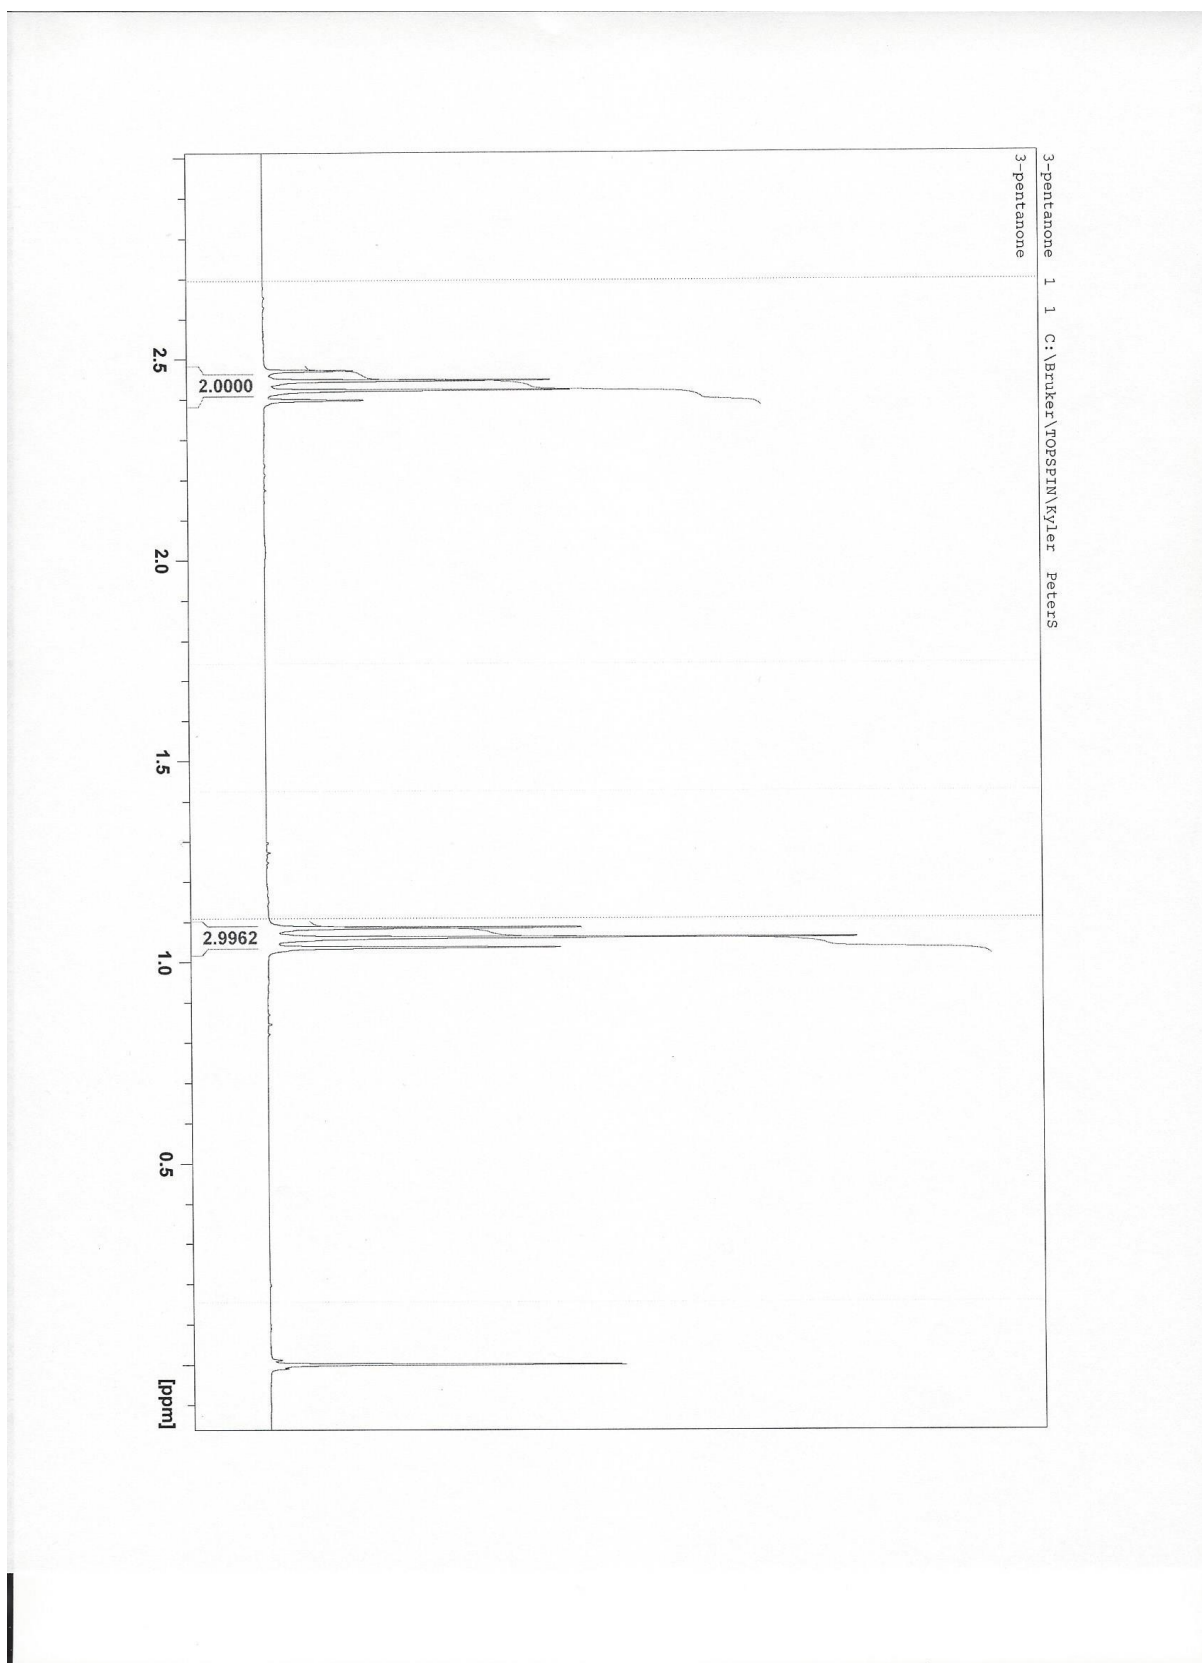

3-pentanone:  $^{13}\text{C}$ -NMR ( $\text{CDCl}_3$ )

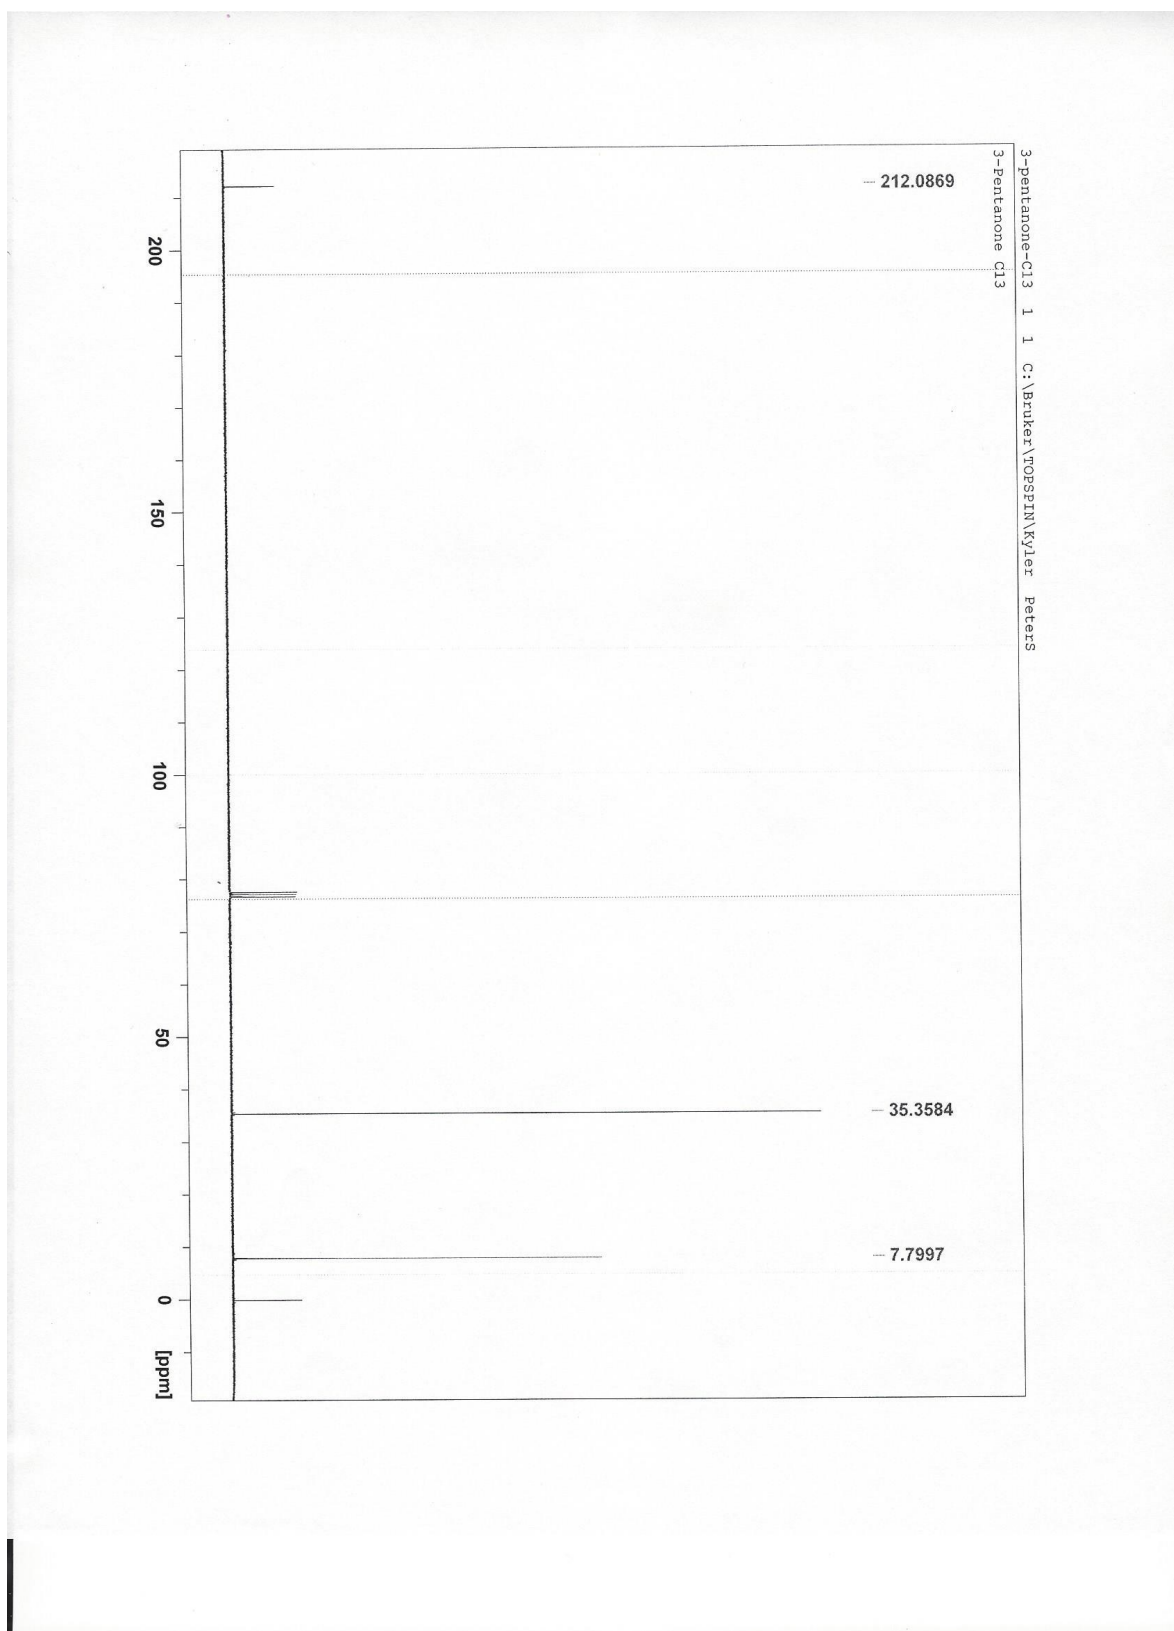

3-pentanone: IR

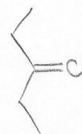

Analyst Administrator  
Date Friday, September 25, 2015 2:48 PM

PerkinElmer Spectrum Version 10.03.06  
Friday, September 25, 2015 2:48 PM

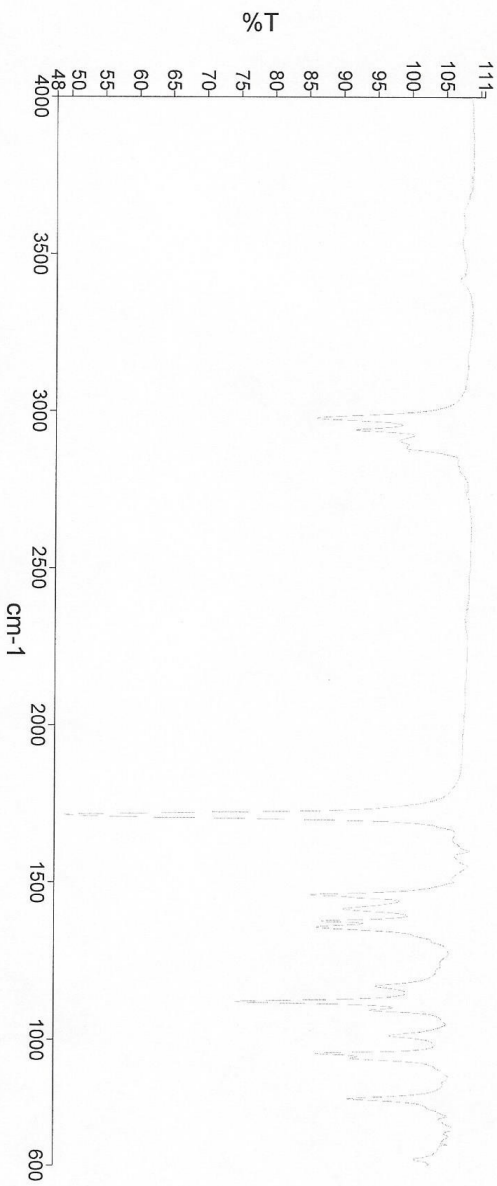

| Sample Name      | Description                                                 | Quality Checks                                                    | Pathlength (mm) |
|------------------|-------------------------------------------------------------|-------------------------------------------------------------------|-----------------|
| Administrator 27 | Sample 027 By Administrator Date Friday, September 25, 2015 | The Quality Checks give rise to multiple warnings for the sample. | 1               |

2,3-Epoxygeraniol:  $^1\text{H-NMR}$  ( $\text{CDCl}_3$ )

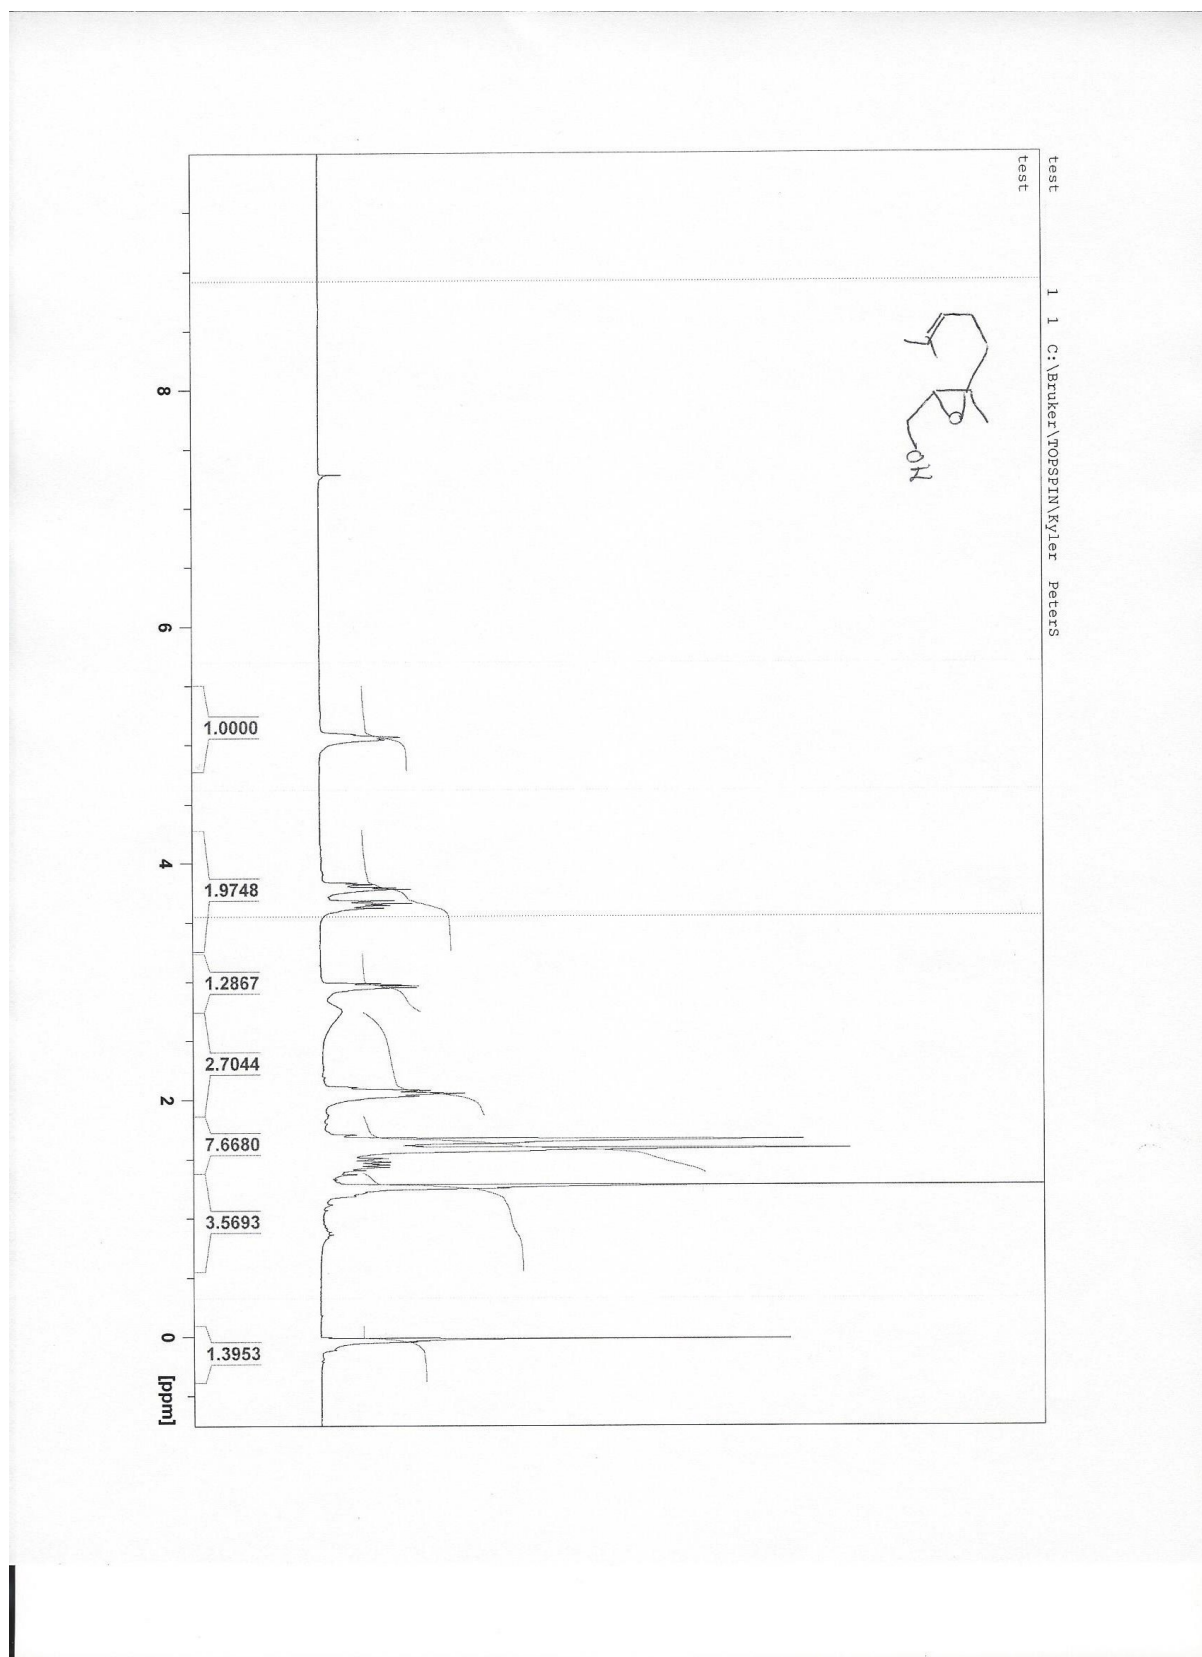

2,3-Epoxygeraniol:  $^{13}\text{C}$ -NMR ( $\text{CDCl}_3$ )

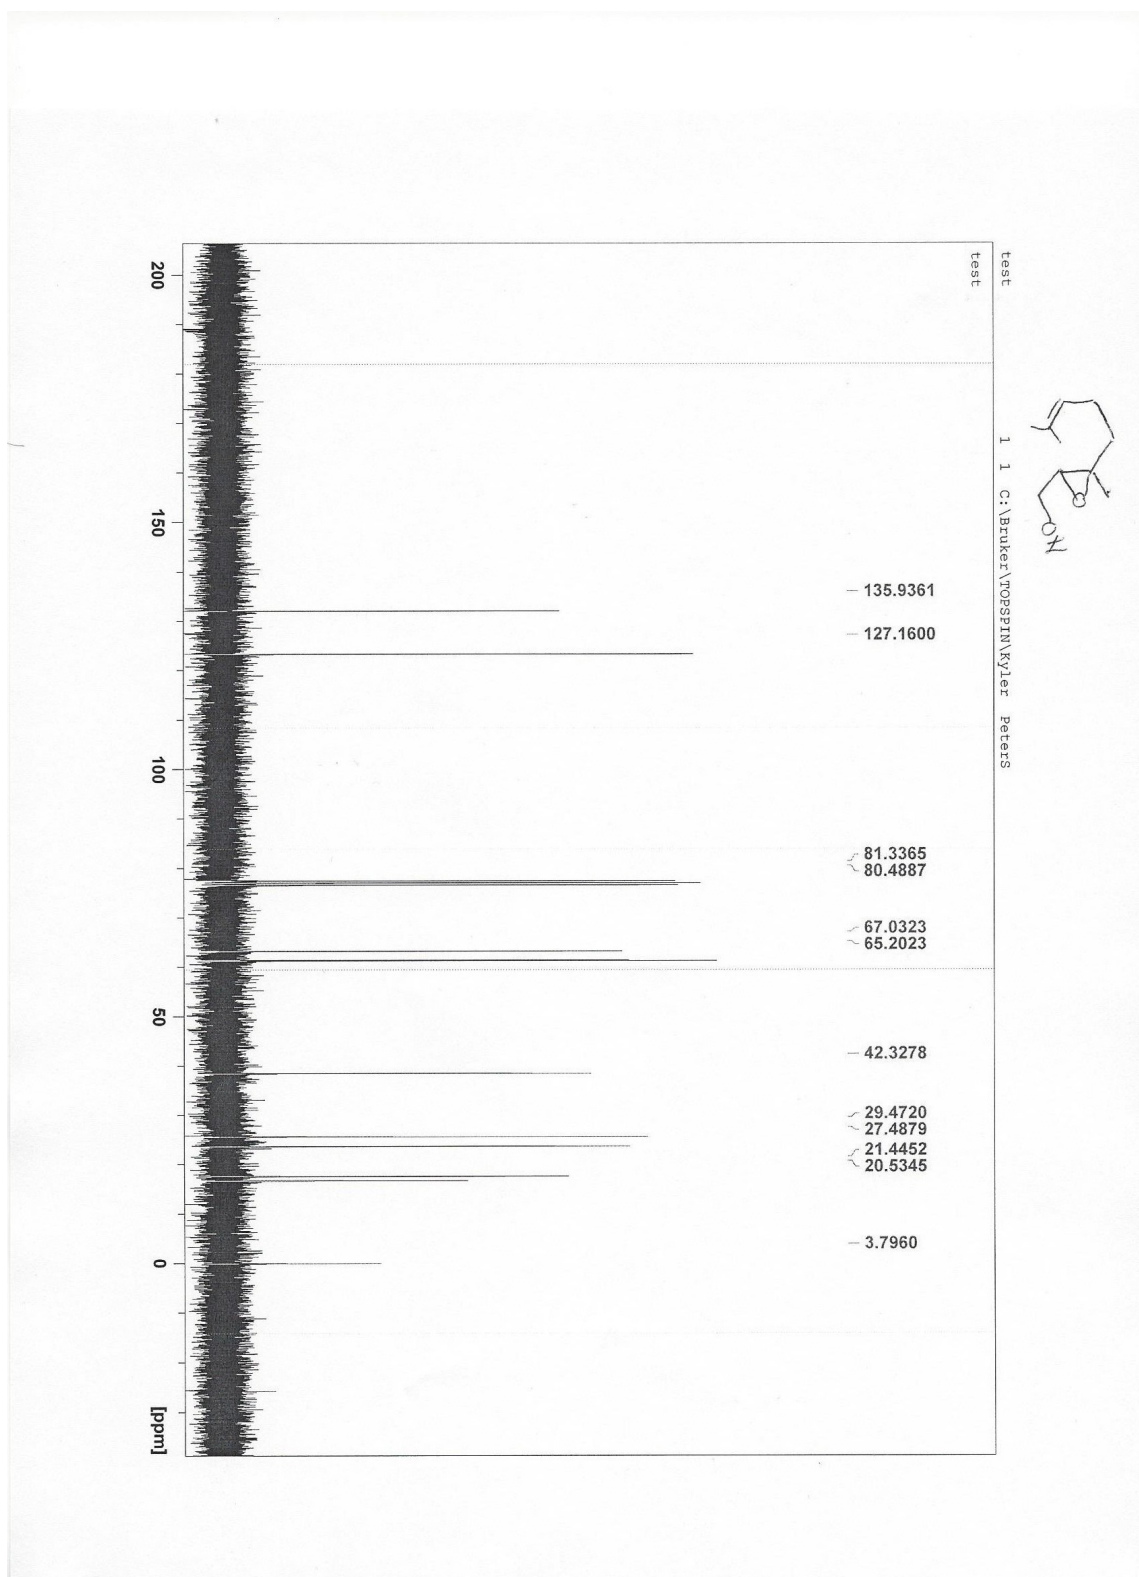

2,3-Epoxygeraniol: IR

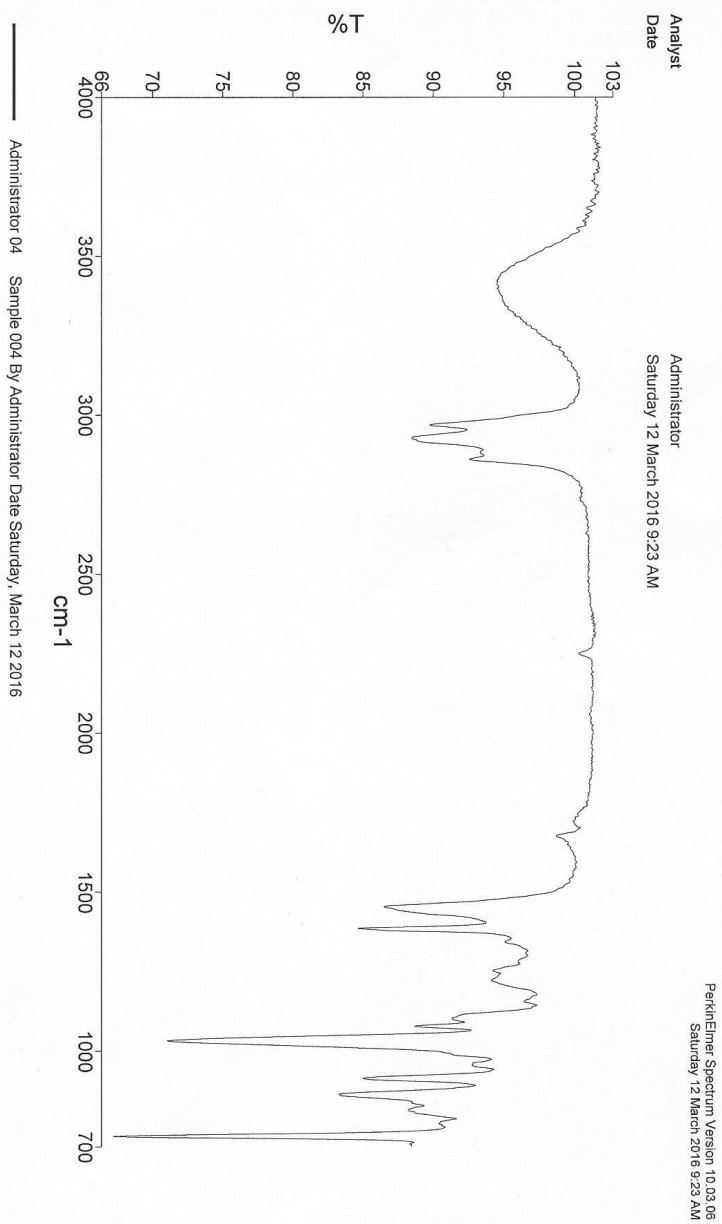

Ethylphenylsulfone: <sup>1</sup>H-NMR (CDCl<sub>3</sub>)

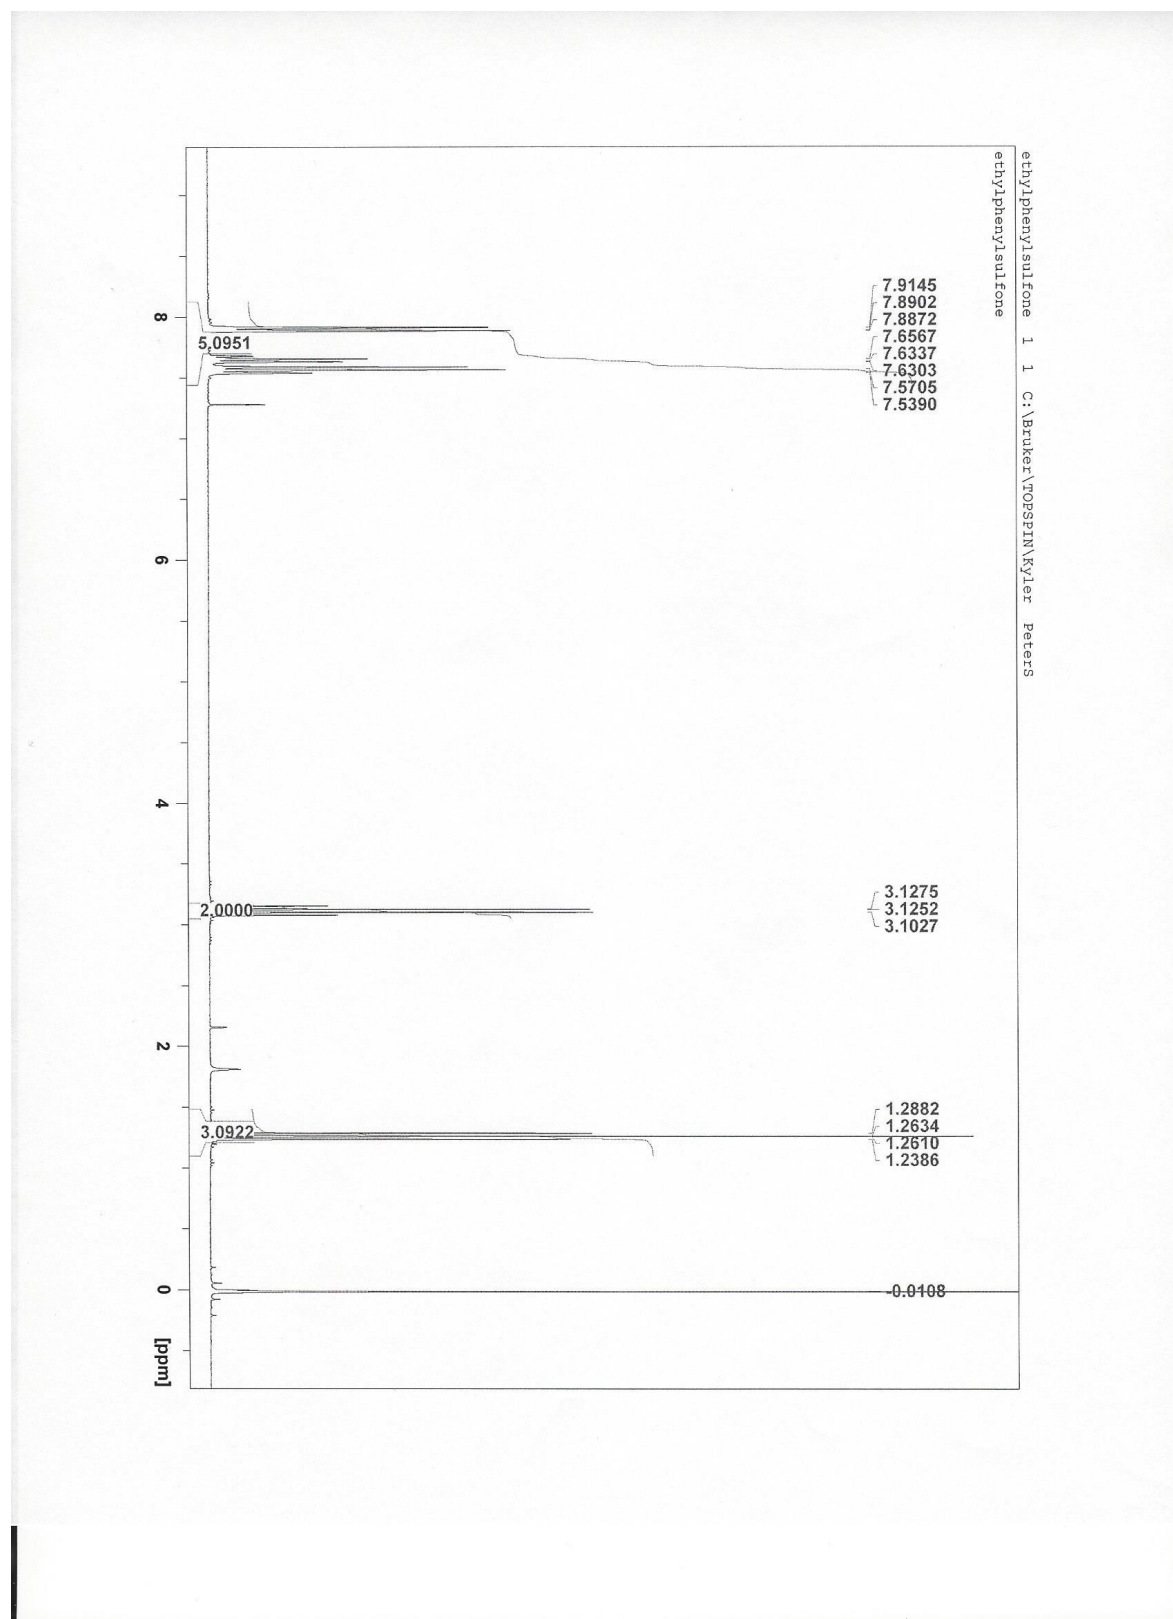

Ethylphenylsulfone:  $^{13}\text{C}$ -NMR ( $\text{CDCl}_3$ )

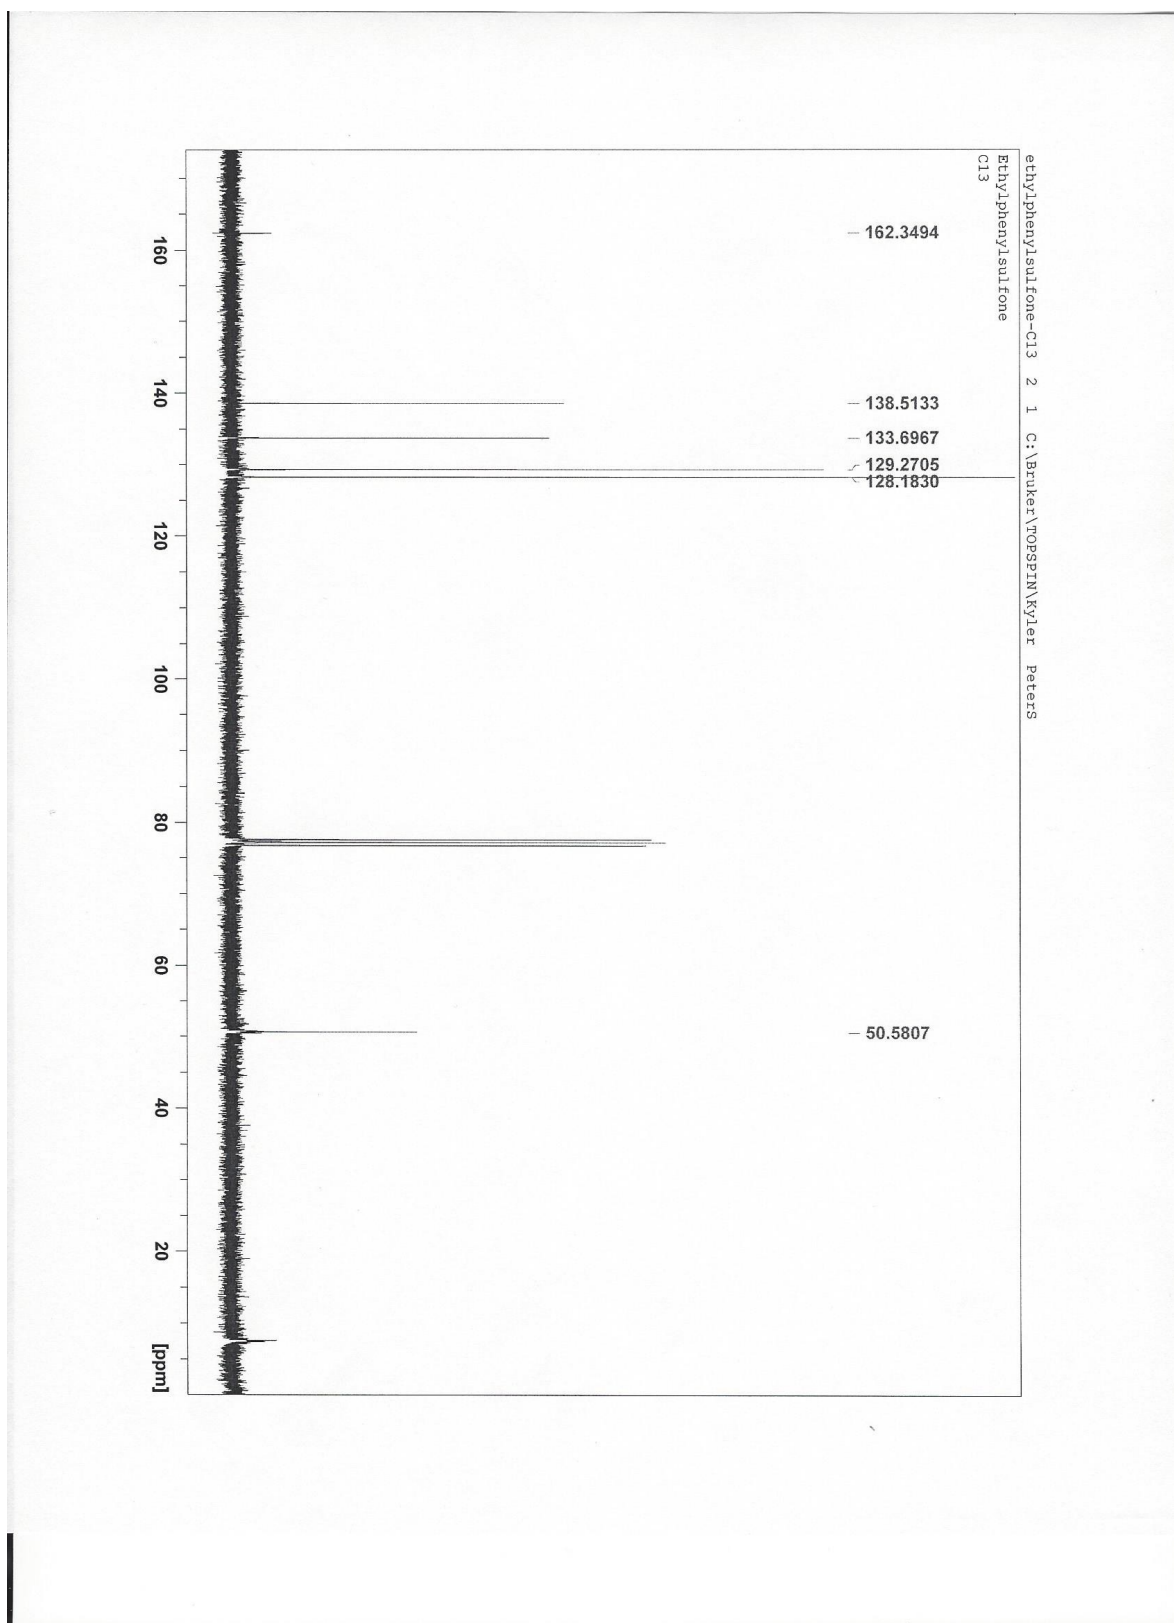



# Ethylphenylsulfone: IR

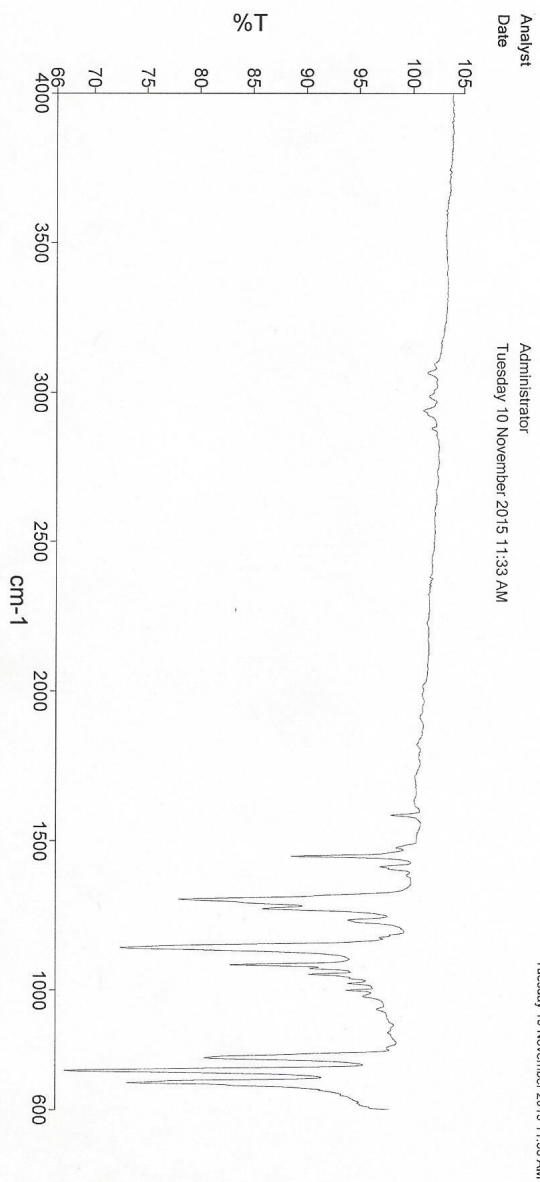

| Sample Name      | Description                                                | Quality Checks                                                    | Pathlength (mm) |
|------------------|------------------------------------------------------------|-------------------------------------------------------------------|-----------------|
| Administrator 02 | Sample 002 By Administrator Date Tuesday, November 10 2015 | The Quality Checks give rise to multiple warnings for the sample. | 1               |

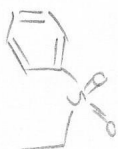

Isopropylphenylsulfone:  $^1\text{H-NMR}$  ( $\text{CDCl}_3$ )

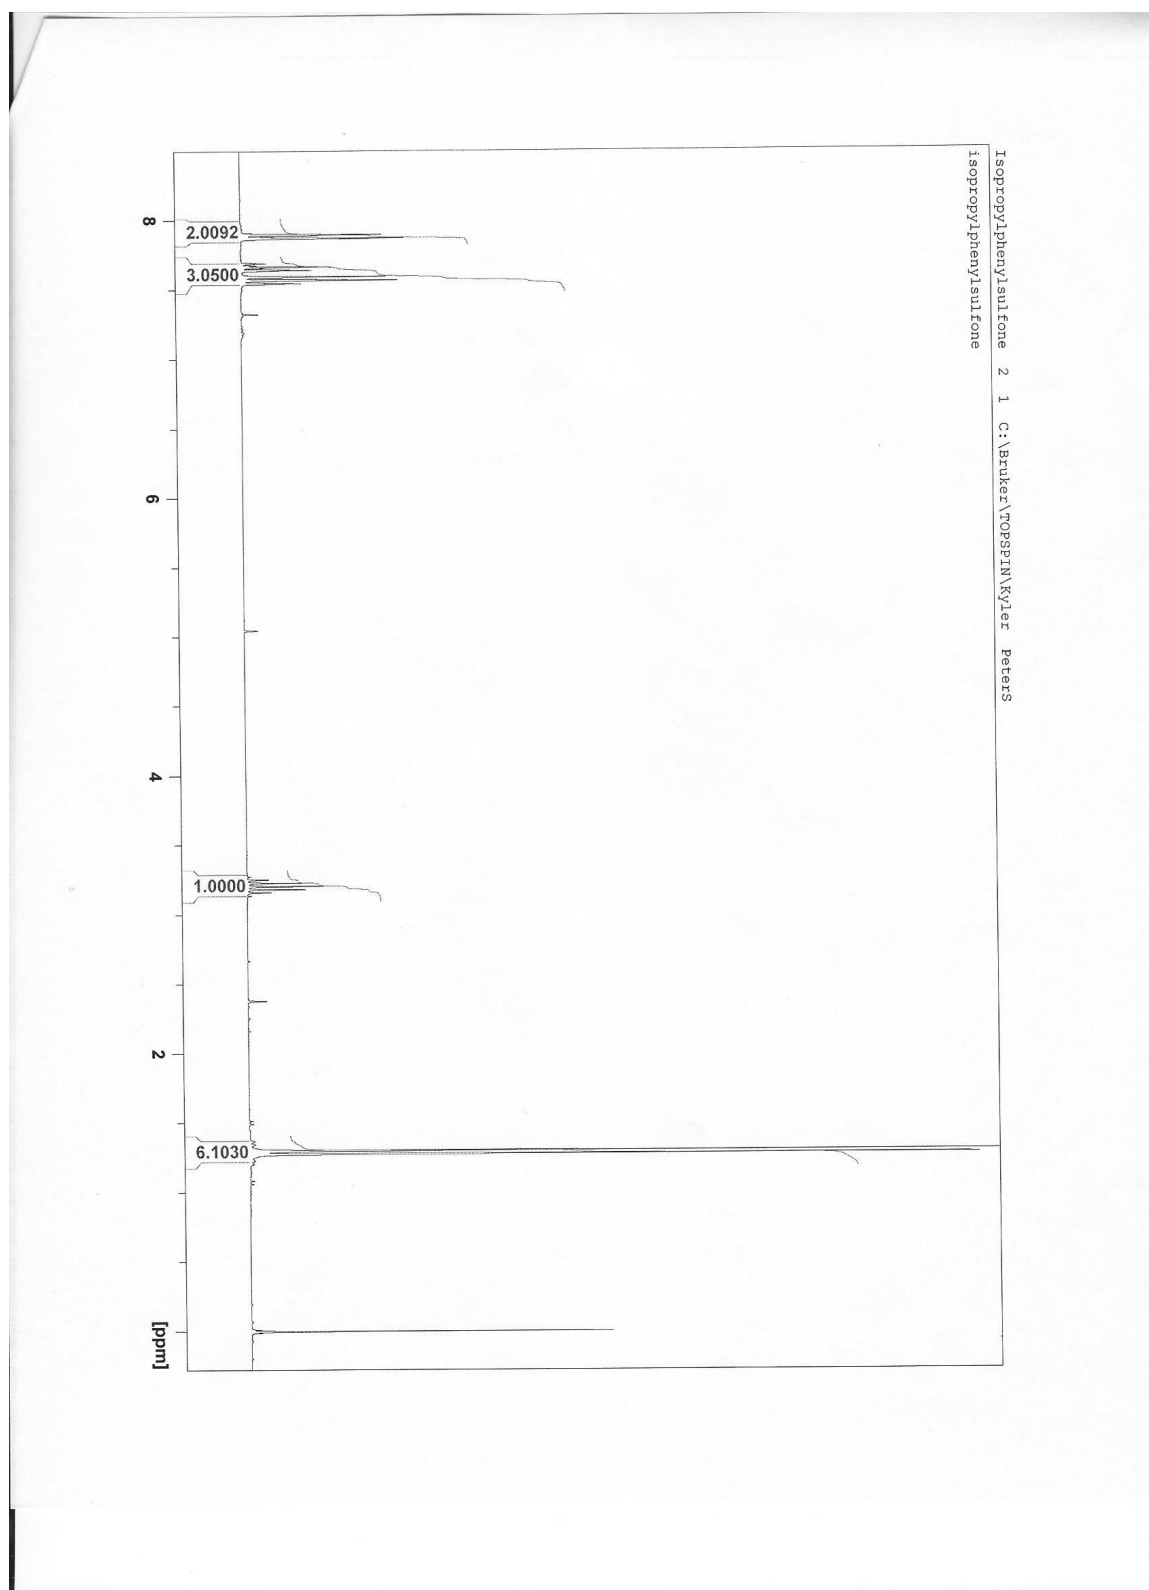

Isopropylphenylsulfone:  $^{13}\text{C}$ -NMR ( $\text{CDCl}_3$ )

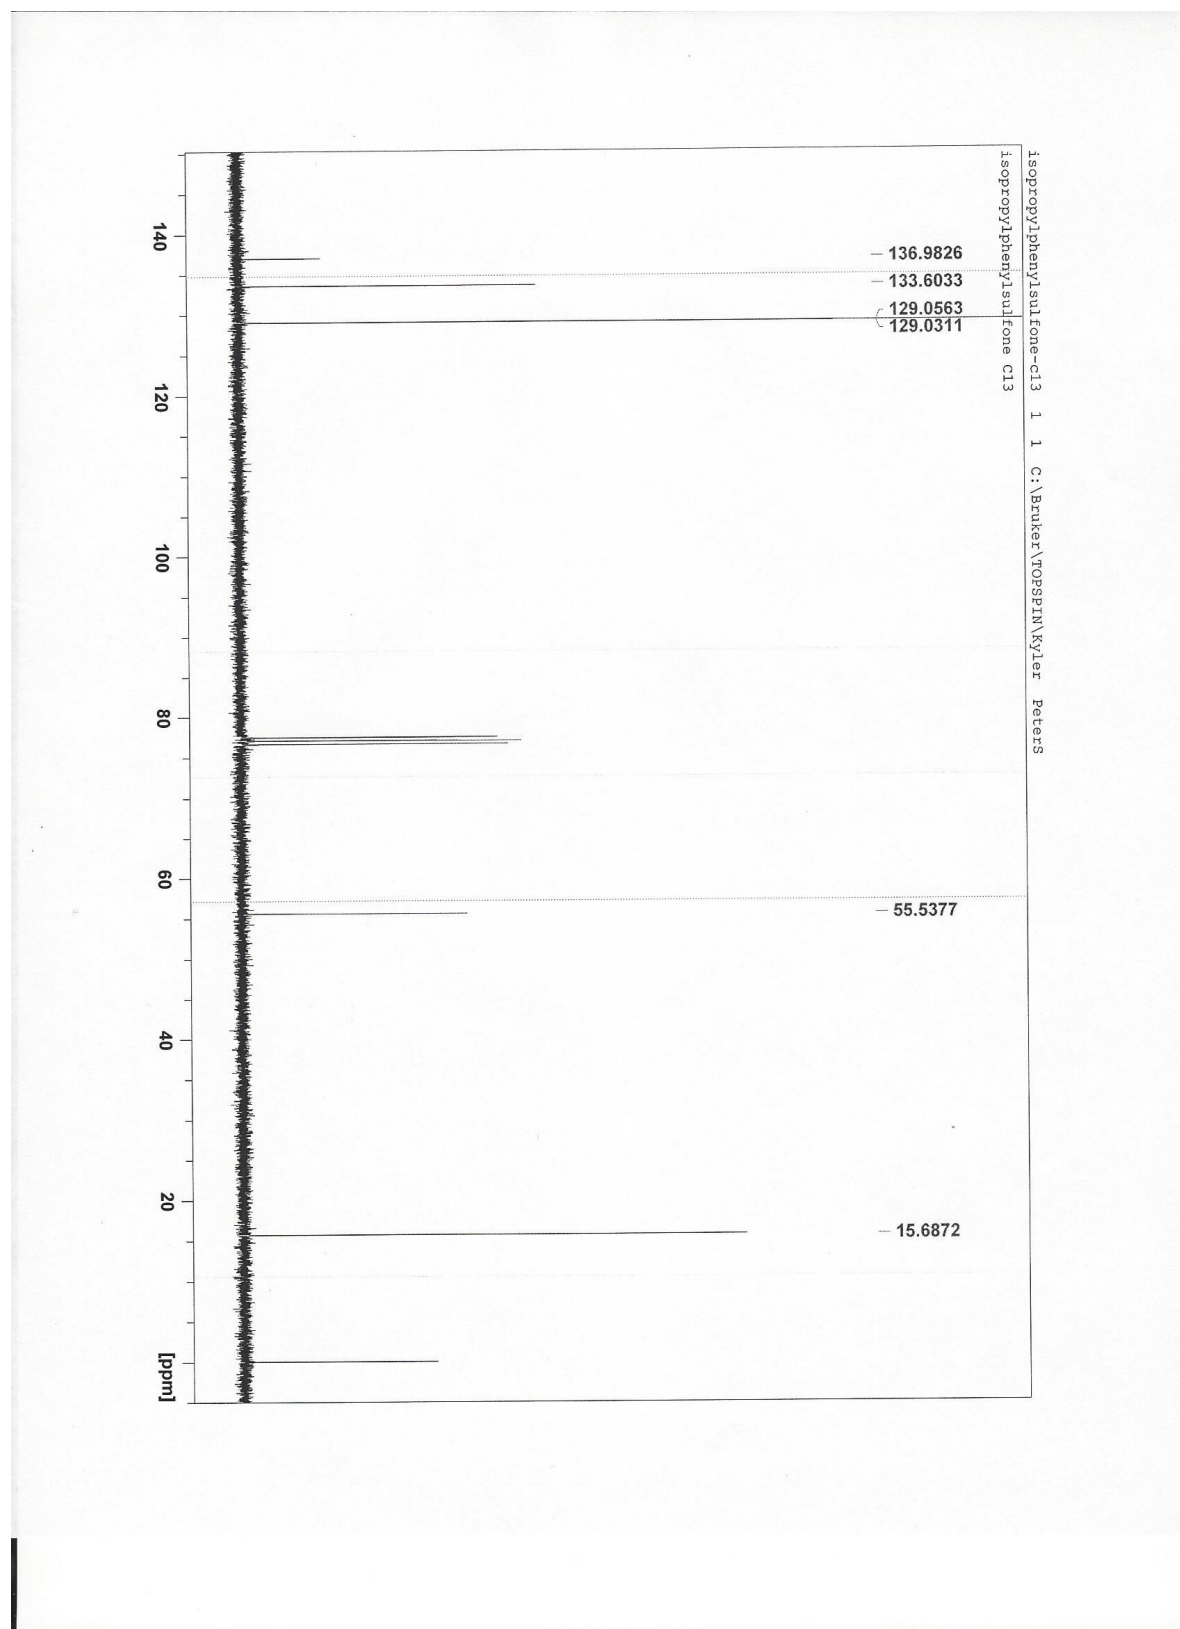

Isopropylphenylsulfone: IR

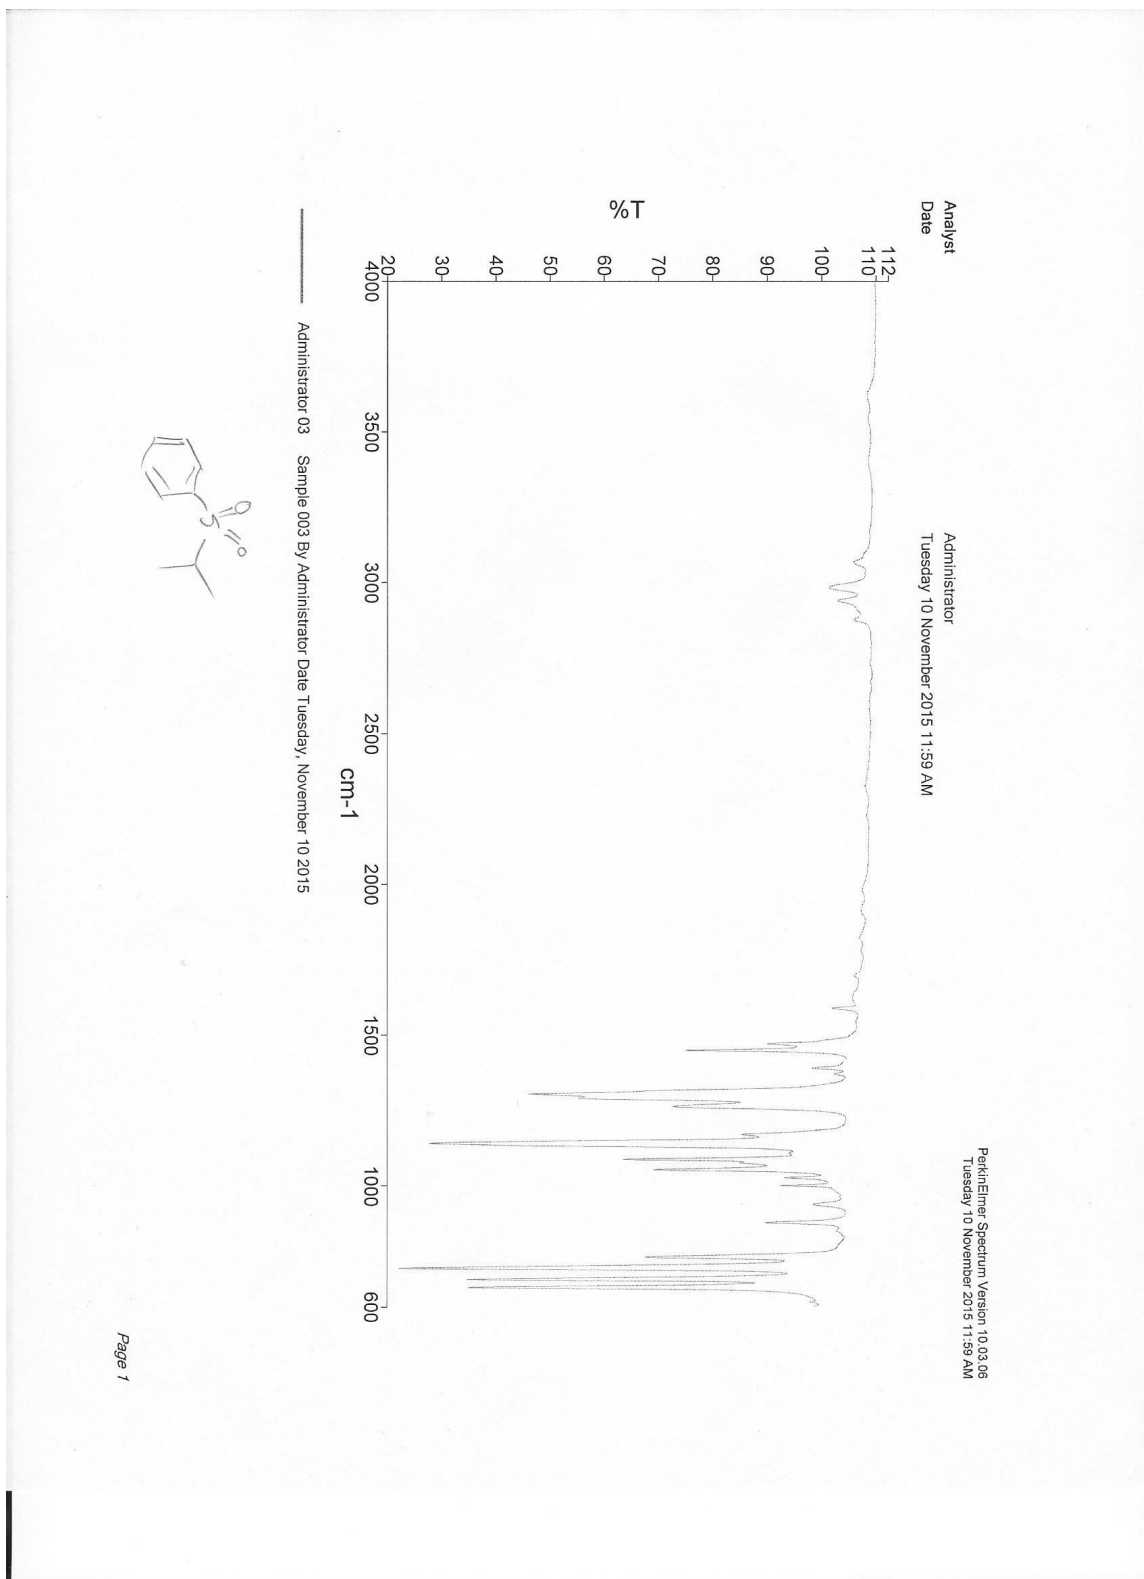

Supplement: c6gc00725b1.pdf [file c6gc00725b1.pdf]
